# Supplementary material for: Novel fatty acid methyl esters from the actinomycete Micromonospora aurantiaca
Source: PubMed Central journal article supplement (PMC3252875; doi:10.3762/bjoc.7.200), 2011-12-20
Supplement: Beilstein_J_Org_Chem-07-1697-s001.pdf [file Beilstein_J_Org_Chem-07-1697-s001.pdf]

# Supporting Information

for

## Novel fatty acid methyl esters from the actinomycete

### *Micromonospora aurantiaca*

Jeroen S. Dickschat\*, Hilke Bruns and Ramona Riclea

Address: Institut für Organische Chemie, Technische Universität Braunschweig,  
Hagenring 30, 38106 Braunschweig, Germany

Email: Jeroen S. Dickschat - [j.dickschat@tu-braunschweig.de](mailto:j.dickschat@tu-braunschweig.de)

\* Corresponding author

## Experimental details and analytical data

**Table S1:** Compounds identified in the headspace extract of *M. aurantiaca*.

| Compound <sup>a</sup>                      | <i>P</i> <sup>b</sup> | Ident. <sup>c</sup> | 1. <sup>d</sup> | 2. <sup>d</sup> |
|--------------------------------------------|-----------------------|---------------------|-----------------|-----------------|
| 3-Hydroxybutan-2-one ( <b>44</b> )         |                       | ms, syn             | xx              | x               |
| 3-Methylbutan-1-ol ( <b>47</b> )           |                       | ms, syn             | xxx             | xx              |
| 2-Methylbutan-1-ol ( <b>48</b> )           |                       | ms, syn             | xx              | xx              |
| Methyl 2-methylbutyrate ( <b>3</b> )       |                       | ms, syn             | x               | x               |
| 3-Hydroxypentan-2-one ( <b>45</b> )        | 803                   | ms, syn             | x               | x               |
| 2-Hydroxypentan-3-one ( <b>46</b> )        | 809                   | ms, syn             | x               | x               |
| 2-Methylpropanoic acid ( <b>49</b> )       | 813                   | ms                  | xxx             | xxx             |
| Methylpyrazine ( <b>64</b> )               | 822                   | ms, syn             | x               | x               |
| Butyric acid ( <b>57</b> )                 | 840                   | ms                  | x               | x               |
| 2,2-Dimethylpropanoic acid ( <b>52</b> )   | 841                   | ms                  | x               | x               |
| 3-Methylbutyric acid ( <b>50</b> )         | 870                   | ms                  | xxx             | xxx             |
| 2,5-Dimethylpyrazine ( <b>65</b> )         | 912                   | ms, syn             | xx              | xx              |
| 2-Methylbutyric acid ( <b>51</b> )         | 922                   | ms                  | xxx             | xxx             |
| Pentanoic acid ( <b>58</b> )               | 925                   | ms                  | x               | x               |
| 3-Methylbut-2-enoic acid ( <b>53</b> )     | 927                   | ms                  | x               | x               |
| 2-Methylbut-2-enoic acid ( <b>54</b> )     | 939                   | ms                  | x               | x               |
| Methyl furan-2-carboxylate ( <b>75</b> )   | 976                   | ms, syn             | x               | x               |
| Hexanoic acid ( <b>59</b> )                | 993                   | ms                  | x               | x               |
| Trimethylpyrazine ( <b>66</b> )            | 1003                  | ms, syn             | x               | x               |
| 2-Acetyl-5-methylfuran ( <b>76</b> )       | 1036                  | ms, syn             | x               | x               |
| 5-Methylhexanoic acid ( <b>55</b> )        | 1055                  | ms                  | x               | x               |
| 2-Acetylpyrrole ( <b>69</b> )              | 1060                  | ms, syn             | x               | x               |
| Methyl 2-methylheptanoate ( <b>13</b> )    | 1062                  | ms, inc             | x               | x               |
| 4-Methylhexanoic acid ( <b>56</b> )        | 1064                  | ms                  | x               | x               |
| 2-Ethyl-3,6-dimethylpyrazine ( <b>67</b> ) | 1078                  | ms, syn             | x               | x               |
| Heptanoic acid ( <b>60</b> )               | 1081                  | ms                  | x               | x               |
| 2-Ethyl-3,5-dimethylpyrazine ( <b>68</b> ) | 1085                  | ms, syn             | x               | x               |
| Linalool ( <b>80</b> )                     | 1098                  | ms, syn             | x               | x               |
| 2-Phenylethanol ( <b>70</b> )              | 1112                  | ms, syn             | xx              | xx              |
| Phenylacetone ( <b>71</b> )                | 1127                  | ms, syn             | x               | x               |
| Methyl phenylacetate ( <b>73</b> )         | 1177                  | ms, syn             | x               | x               |
| Octanoic acid ( <b>61</b> )                | 1179                  | ms                  | x               | x               |

|                                                  |      |              |   |   |
|--------------------------------------------------|------|--------------|---|---|
| Methyl salicylate ( <b>74</b> )                  | 1192 | ms, syn      | x | x |
| Decanal ( <b>77</b> )                            | 1203 | ms, syn      | x | x |
| Methyl nonanoate ( <b>86</b> )                   | 1223 | ms, syn      | x | x |
| 1-Phenylbutan-2-one ( <b>72</b> )                | 1224 | ms, syn      | x | x |
| Methyl 2-methylnonanoate ( <b>14</b> )           | 1259 | ms, inc      | x | x |
| Nonanoic acid ( <b>62</b> )                      | 1269 | ms           | x | x |
| Methyl 8-methylnonanoate ( <b>98</b> )           | 1286 | ms, inc      | x | x |
| Methyl decanoate ( <b>82</b> )                   | 1322 | ms, syn      | x | x |
| 7-Methyloctan-4-olide ( <b>78</b> )              | 1323 | ms, syn      | x | x |
| Methyl 4,8-dimethylnonanoate ( <b>106</b> )      | 1336 | ms, inc      | x | x |
| Methyl 2-methyldecanoate ( <b>10</b> )           | 1357 | ms, inc, syn | x | x |
| Nonan-4-olide ( <b>79</b> )                      | 1361 | ms, syn      | x | x |
| Decanoic acid ( <b>63</b> )                      | 1364 | ms           | x | x |
| Methyl 4-methyldecanoate ( <b>89</b> )           | 1375 | ms, inc      | x | x |
| Methyl 9-methyldecanoate ( <b>8</b> )            | 1385 | ms, inc, syn | x | x |
| Methyl 8-methyldecanoate ( <b>95</b> )           | 1392 | ms, inc, syn | x | x |
| 6,10-Dimethylundecan-2-one                       | 1402 | ms, syn      | x | x |
| Methyl 2,9-dimethyldecanoate ( <b>24</b> )       | 1419 | ms, inc, syn | x | x |
| Methyl undecanoate ( <b>87</b> )                 | 1421 | ms, syn      | x | x |
| Methyl 4,9-dimethyldecanoate ( <b>109</b> )      | 1437 | ms, inc      | x | x |
| Methyl 4,8-dimethyldecanoate ( <b>112</b> )      | 1441 | ms, syn      | x | x |
| 6,10-Dimethylundeca-5,9-dien-2-one ( <b>81</b> ) | 1450 | ms, syn      | x | x |
| Methyl 2-methylundecanoate ( <b>15</b> )         | 1456 | ms, inc      | x | x |
| Methyl 4-methylundecanoate ( <b>92</b> )         | 1473 | ms, inc      | x | x |
| Methyl 10-methylundecanoate ( <b>99</b> )        | 1484 | ms, inc      | x | x |
| Methyl 2,10-dimethylundecanoate ( <b>104</b> )   | 1517 | ms, inc      | x | x |
| Methyl dodecanoate ( <b>83</b> )                 | 1520 | ms, syn      | x | x |
| Methyl 4,8-dimethylundecanoate ( <b>114</b> )    | 1525 | ms, syn      | x | x |
| Methyl 4,10-dimethylundecanoate ( <b>107</b> )   | 1534 | ms, inc      | x | x |
| Methyl 2-methyldodecanoate ( <b>11</b> )         | 1555 | ms, inc      | x | x |
| Methyl 4-methyldodecanoate ( <b>90</b> )         | 1572 | ms, inc      | x | x |
| Methyl 11-methyldodecanoate ( <b>102</b> )       | 1584 | ms, inc      | x | x |
| Methyl 10-methyldodecanoate ( <b>96</b> )        | 1591 | ms, inc      | x | x |
| Methyl 2,11-dimethyldodecanoate ( <b>25</b> )    | 1617 | ms, inc      | x | x |

|                                                   |      |         |   |   |
|---------------------------------------------------|------|---------|---|---|
| Methyl 4,8-dimethyldodecanoate ( <b>115</b> )     | 1618 | ms      | x | x |
| Methyl tridecanoate ( <b>88</b> )                 | 1620 | ms, syn | x | x |
| Methyl 4,11-dimethyldodecanoate ( <b>110</b> )    | 1633 | ms, syn | x | x |
| Methyl 4,10-dimethyldodecanoate ( <b>113</b> )    | 1641 | ms, inc | x | x |
| Methyl 2-methyltridecanoate ( <b>16</b> )         | 1653 | ms, inc | x | x |
| Methyl 3,7,11-trimethyldodecanoate                | 1660 | ms, inc | x | x |
| Methyl 4-methyltridecanoate ( <b>93</b> )         | 1670 | ms, inc | x | x |
| Methyl 12-methyltridecanoate ( <b>100</b> )       | 1683 | ms, inc | x | x |
| Methyl 8-ethyl-4-methyldodecanoate ( <b>116</b> ) | 1713 | ms      | x | x |
| Methyl 2,12-dimethyltridecanoate ( <b>105</b> )   | 1716 | ms, inc | x | x |
| Methyl tetradecanoate ( <b>84</b> )               | 1720 | ms, syn | x | x |
| Methyl 4,12-dimethyltridecanoate ( <b>108</b> )   | 1733 | ms, inc | x | x |
| Methyl 2-methyltetradecanoate ( <b>12</b> )       | 1753 | ms, inc | x | x |
| Methyl 4-methyltetradecanoate ( <b>91</b> )       | 1770 | ms, inc | x | x |
| Methyl 13-methyltetradecanoate ( <b>103</b> )     | 1783 | ms, inc | x | x |
| Methyl 12-methyltetradecanoate ( <b>97</b> )      | 1790 | ms, inc | x | x |
| Methyl 2,13-dimethyltetradecanoate ( <b>26</b> )  | 1816 | ms, inc | x | x |
| Methyl 4,13-dimethyltetradecanoate ( <b>111</b> ) | 1833 | ms, inc | x | x |
| Methyl 2-methylpentadecanoate ( <b>17</b> )       | 1852 | ms, inc | x | x |
| Methyl 4-methylpentadecanoate ( <b>94</b> )       | 1869 | ms, inc | x | x |
| Methyl 14-methylpentadecanoate ( <b>101</b> )     | 1883 | ms, inc | x | x |
| Methyl hexadecanoate ( <b>85</b> )                | 1918 | ms, syn | x | x |

<sup>a</sup>Unidentified compounds, compounds originating from the medium, and artifacts are not listed. <sup>b</sup>Retention indices / were determined from a homologous series of alkanes (C8–C36). <sup>c</sup>Compound identification was based on the mass spectrum (ms), comparison of the retention index to tabulated data from the literature (ri), comparison to a synthetic reference compound (syn), or an increment system for retention indices (inc). <sup>d</sup>Results from two different headspace extracts. Relative amounts of the volatile components are indicated by x: 0–2%, xx: 2–8%, xxx: > 8% of total area in the gas chromatogram.

**Table S2:** Determination of  $FG(n)_{\text{FAME, HP-5 MS}}$  from a homologous series of unbranched FAMEs.

| Compound                            | $I^a$ | $N(n)^b$ | $n^c$ | $FG(n)_{\text{FAME, HP-5 MS}}^d$ |
|-------------------------------------|-------|----------|-------|----------------------------------|
| Methyl hexanoate                    | 924   | 600      | 6     | 324                              |
| Methyl heptanoate                   | 1023  | 700      | 7     | 323                              |
| Methyl octanoate                    | 1123  | 800      | 8     | 323                              |
| Methyl nonanoate ( <b>86</b> )      | 1223  | 900      | 9     | 323                              |
| Methyl decanoate ( <b>82</b> )      | 1322  | 1000     | 10    | 322                              |
| Methyl undecanoate ( <b>87</b> )    | 1421  | 1100     | 11    | 321                              |
| Methyl dodecanoate ( <b>83</b> )    | 1520  | 1200     | 12    | 320                              |
| Methyl tridecanoate ( <b>88</b> )   | 1620  | 1300     | 13    | 320                              |
| Methyl tetradecanoate ( <b>84</b> ) | 1720  | 1400     | 14    | 320                              |
| Methyl pentadecanoate               | 1819  | 1500     | 15    | 319                              |
| Methyl hexadecanoate ( <b>85</b> )  | 1918  | 1600     | 16    | 318                              |
| Methyl octadecanoate                | 2118  | 1800     | 18    | 318                              |

<sup>a</sup>Measured retention index  $I$  on a HP-5 MS column. <sup>b</sup>Increment for the longest alkyl chain with  $n$  carbons,  $N(n) = 100 n$ . <sup>c</sup>Number of carbons  $n$  in the longest alkyl chain.

<sup>d</sup>Increment for the functional group of a FAME on a HP-5 MS column,

$FG(n)_{\text{FAME, HP-5 MS}}$ .

**Table S3:** Calculated retention indices  $I_{\text{calc.}}(n)$  for  $\alpha$ -methyl branched FAMES.

| Compound                                    | $I^a$ | $n^b$ | $I_{\text{calc.}}(n)^c$ | $I_{\text{calc.}}(n)^d$ |
|---------------------------------------------|-------|-------|-------------------------|-------------------------|
| Methyl 2-methylheptanoate ( <b>13</b> )     | 1062  | 7     | 1058                    | 1061                    |
| Methyl 2-methylnonanoate ( <b>14</b> )      | 1259  | 9     | 1257                    | 1259                    |
| Methyl 2-methyldecanoate ( <b>10</b> )      | 1357  | 10    | 1357                    | 1357                    |
| Methyl 2-methylundecanoate ( <b>15</b> )    | 1456  | 11    | 1456                    | 1456                    |
| Methyl 2-methyldodecanoate ( <b>11</b> )    | 1555  | 12    | 1556                    | 1555                    |
| Methyl 2-methyltridecanoate ( <b>16</b> )   | 1653  | 13    | 1655                    | 1654                    |
| Methyl 2-methyltetradecanoate ( <b>12</b> ) | 1753  | 14    | 1754                    | 1752                    |
| Methyl 2-methylpentadecanoate ( <b>17</b> ) | 1852  | 15    | 1854                    | 1851                    |

<sup>a</sup>Measured retention index  $I$  on a HP-5 MS column. <sup>b</sup>Number of carbons  $n$  in the longest alkyl chain. <sup>c</sup>Calculated retention indices after Equation 3,  $Me_\alpha = 35$ .

<sup>d</sup>Calculated retention indices after Equation 3 and Equation 4.

**Table S4:** Calculated retention indices  $I_{\text{calc.}}(n)$  for  $\gamma$ -methyl branched FAMES.

| Compound                                    | $I^a$ | $n^b$ | $I_{\text{calc.}}(n)^c$ | $I_{\text{calc.}}(n)^d$ |
|---------------------------------------------|-------|-------|-------------------------|-------------------------|
| Methyl 4-methyldecanoate ( <b>89</b> )      | 1375  | 10    | 1373                    | 1374                    |
| Methyl 4-methylundecanoate ( <b>92</b> )    | 1473  | 11    | 1472                    | 1473                    |
| Methyl 4-methyldodecanoate ( <b>90</b> )    | 1572  | 12    | 1572                    | 1572                    |
| Methyl 4-methyltridecanoate ( <b>93</b> )   | 1670  | 13    | 1671                    | 1671                    |
| Methyl 4-methyltetradecanoate ( <b>91</b> ) | 1770  | 14    | 1770                    | 1770                    |
| Methyl 4-methylpentadecanoate ( <b>94</b> ) | 1869  | 15    | 1870                    | 1869                    |

<sup>a</sup>Measured retention index  $I$  on a HP-5 MS column. <sup>b</sup>Number of carbons  $n$  in the longest alkyl chain. <sup>c</sup>Calculated retention indices after Equation 3,  $Me_\gamma = 51$ .

<sup>d</sup>Calculated retention indices after Equation 3 and Equation 5.

**Table S5:** Calculated retention indices  $I_{\text{calc.}}(n)$  for ( $\omega$ -2)-methyl branched FAMES.

| Compound                                                 | $I^a$ | $n^b$ | $I_{\text{calc.}}(n)^c$ |
|----------------------------------------------------------|-------|-------|-------------------------|
| Methyl 5-methylheptanoate ( <b>118b</b> ) <sup>[d]</sup> | 1093  | 7     | 1093                    |
| Methyl 6-methyloctanoate ( <b>121c</b> ) <sup>[d]</sup>  | 1193  | 8     | 1193                    |
| Methyl 8-methyldecanoate ( <b>95</b> )                   | 1392  | 10    | 1392                    |
| Methyl 10-methyldodecanoate ( <b>96</b> )                | 1591  | 12    | 1591                    |
| Methyl 12-methyltetradecanoate ( <b>97</b> )             | 1790  | 14    | 1889                    |

<sup>a</sup>Measured retention index  $I$  on a HP-5 MS column. <sup>b</sup>Number of carbons  $n$  in the longest alkyl chain. <sup>c</sup>Calculated retention indices after Equation 3,  $Me_{\omega-2} = 70$ . <sup>d</sup>Not produced by *M. aurantiaca*, intermediates in the syntheses of **95** and **112**.

**Table S6:** Calculated retention indices  $I_{\text{calc.}}(n)$  for ( $\omega$ -1)-methyl branched FAMES.

| Compound                                                 | $I^a$ | $n^b$ | $I_{\text{calc.}}(n)^c$ |
|----------------------------------------------------------|-------|-------|-------------------------|
| Methyl 6-methylheptanoate ( <b>118a</b> ) <sup>[d]</sup> | 1086  | 7     | 1086                    |
| Methyl 8-methylnonanoate ( <b>98</b> )                   | 1286  | 9     | 1285                    |
| Methyl 9-methyldecanoate ( <b>8</b> )                    | 1385  | 10    | 1385                    |
| Methyl 10-methylundecanoate ( <b>99</b> )                | 1484  | 11    | 1484                    |
| Methyl 11-methyldodecanoate ( <b>102</b> )               | 1584  | 12    | 1584                    |
| Methyl 12-methyltridecanoate ( <b>100</b> )              | 1683  | 13    | 1683                    |
| Methyl 13-methyltetradecanoate ( <b>103</b> )            | 1783  | 14    | 1782                    |
| Methyl 14-methylpentadecanoate ( <b>101</b> )            | 1883  | 15    | 1882                    |

<sup>a</sup>Measured retention index  $I$  on a HP-5 MS column. <sup>b</sup>Number of carbons  $n$  in the longest alkyl chain. <sup>c</sup>Calculated retention indices after Equation 3,  $Me_{\omega-1} = 63$ . <sup>d</sup>Not produced by *M. aurantiaca*, intermediate in the synthesis of **8**.

**Table S7:** Calculated retention indices  $I_{\text{calc.}}(n)$  for  $\alpha$ - and ( $\omega$ -1)-methyl branched FAMEs.

| Compound                                         | $I^a$ | $n^b$ | $I_{\text{calc.}}(n)^c$ |
|--------------------------------------------------|-------|-------|-------------------------|
| Methyl 2,9-dimethyldecanoate ( <b>24</b> )       | 1419  | 10    | 1420                    |
| Methyl 2,10-dimethylundecanoate ( <b>104</b> )   | 1517  | 11    | 1519                    |
| Methyl 2,11-dimethyldodecanoate ( <b>25</b> )    | 1617  | 12    | 1618                    |
| Methyl 2,12-dimethyltridecanoate ( <b>105</b> )  | 1716  | 13    | 1716                    |
| Methyl 2,13-dimethyltetradecanoate ( <b>26</b> ) | 1816  | 14    | 1815                    |

<sup>a</sup>Measured retention index  $I$  on a HP-5 MS column. <sup>b</sup>Number of carbons  $n$  in the longest alkyl chain. <sup>c</sup>Calculated retention indices after Equation 3 and Equation 4,  $Me_{\omega-1} = 63$ .

**Table S8:** Calculated retention indices  $I_{\text{calc.}}(n)$  for  $\gamma$ - and ( $\omega$ -1)-methyl branched FAMEs.

| Compound                                          | $I^a$ | $n^b$ | $I_{\text{calc.}}(n)^c$ |
|---------------------------------------------------|-------|-------|-------------------------|
| Methyl 4,8-dimethylnonanoate ( <b>106</b> )       | 1336  | 9     | 1338                    |
| Methyl 4,9-dimethyldecanoate ( <b>109</b> )       | 1437  | 10    | 1437                    |
| Methyl 4,10-dimethylundecanoate ( <b>107</b> )    | 1534  | 11    | 1536                    |
| Methyl 4,11-dimethyldodecanoate ( <b>110</b> )    | 1633  | 12    | 1635                    |
| Methyl 4,12-dimethyltridecanoate ( <b>108</b> )   | 1733  | 13    | 1734                    |
| Methyl 4,13-dimethyltetradecanoate ( <b>111</b> ) | 1833  | 14    | 1833                    |

<sup>a</sup>Measured retention index  $I$  on a HP-5 MS column. <sup>b</sup>Number of carbons  $n$  in the longest alkyl chain. <sup>c</sup>Calculated retention indices after Equation 3 and Equation 5,  $Me_{\omega-1} = 63$ .



**Table S9:** Calculated retention indices  $I_{\text{calc.}}(n)$  for  $\gamma$ - and ( $\omega$ -2)-methyl branched FAMES.

| Compound                                       | $I^a$ | $n^b$ | $I_{\text{calc.}}(n)^c$ |
|------------------------------------------------|-------|-------|-------------------------|
| Methyl 4,8-dimethyldecanoate ( <b>112</b> )    | 1441  | 10    | 1444                    |
| Methyl 4,10-dimethyldodecanoate ( <b>113</b> ) | 1641  | 12    | 1642                    |

<sup>a</sup>Measured retention index  $I$  on a HP-5 MS column. <sup>b</sup>Number of carbons  $n$  in the longest alkyl chain. <sup>c</sup>Calculated retention indices after Equation 3 and Equation 5,  $Me_{\omega-2} = 70$ .

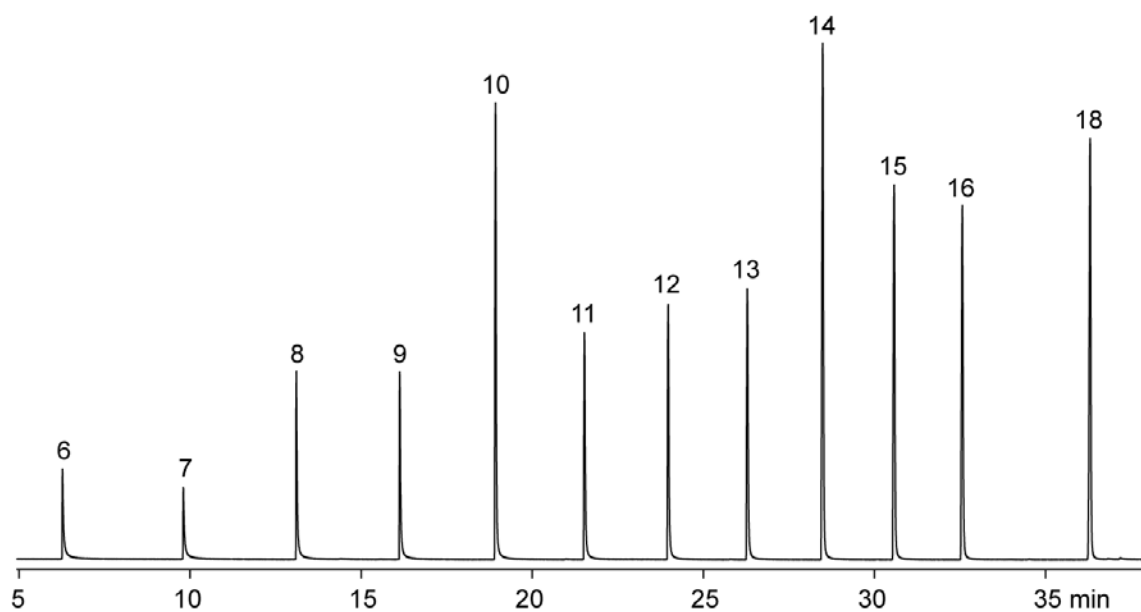

**Figure S1:** GC analysis of a mixture of unbranched FAMES for the determination of the functional group increment  $FG(n)_{\text{FAME, HP-5 MS}}$  (Table 2 and Figure 6 of main text). Numbers above the peaks indicate the lengths of the fatty acyl chains.

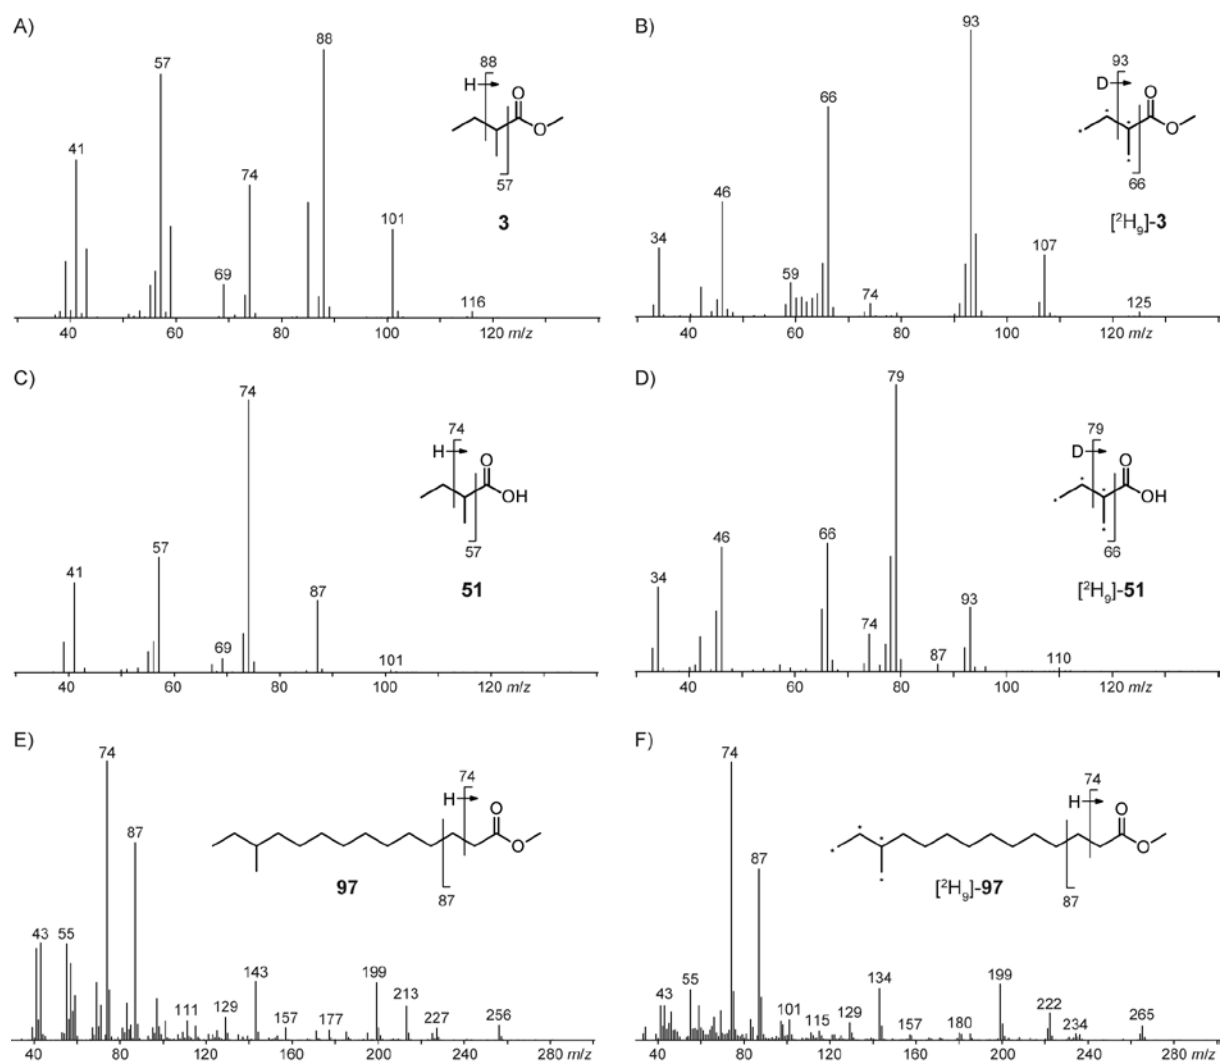

**Figure S2:** Mass spectra of **3** (A), of  $[\text{}^2\text{H}_9]$ -**3** after feeding of  $[\text{}^2\text{H}_{10}]$ isoleucine (B), of **51** (C), of  $[\text{}^2\text{H}_9]$ -**51** after feeding of  $[\text{}^2\text{H}_{10}]$ isoleucine, of **97** (E), and of  $[\text{}^2\text{H}_9]$ -**97** after feeding of  $[\text{}^2\text{H}_{10}]$ isoleucine. Asterisks indicate completely deuterated carbons.

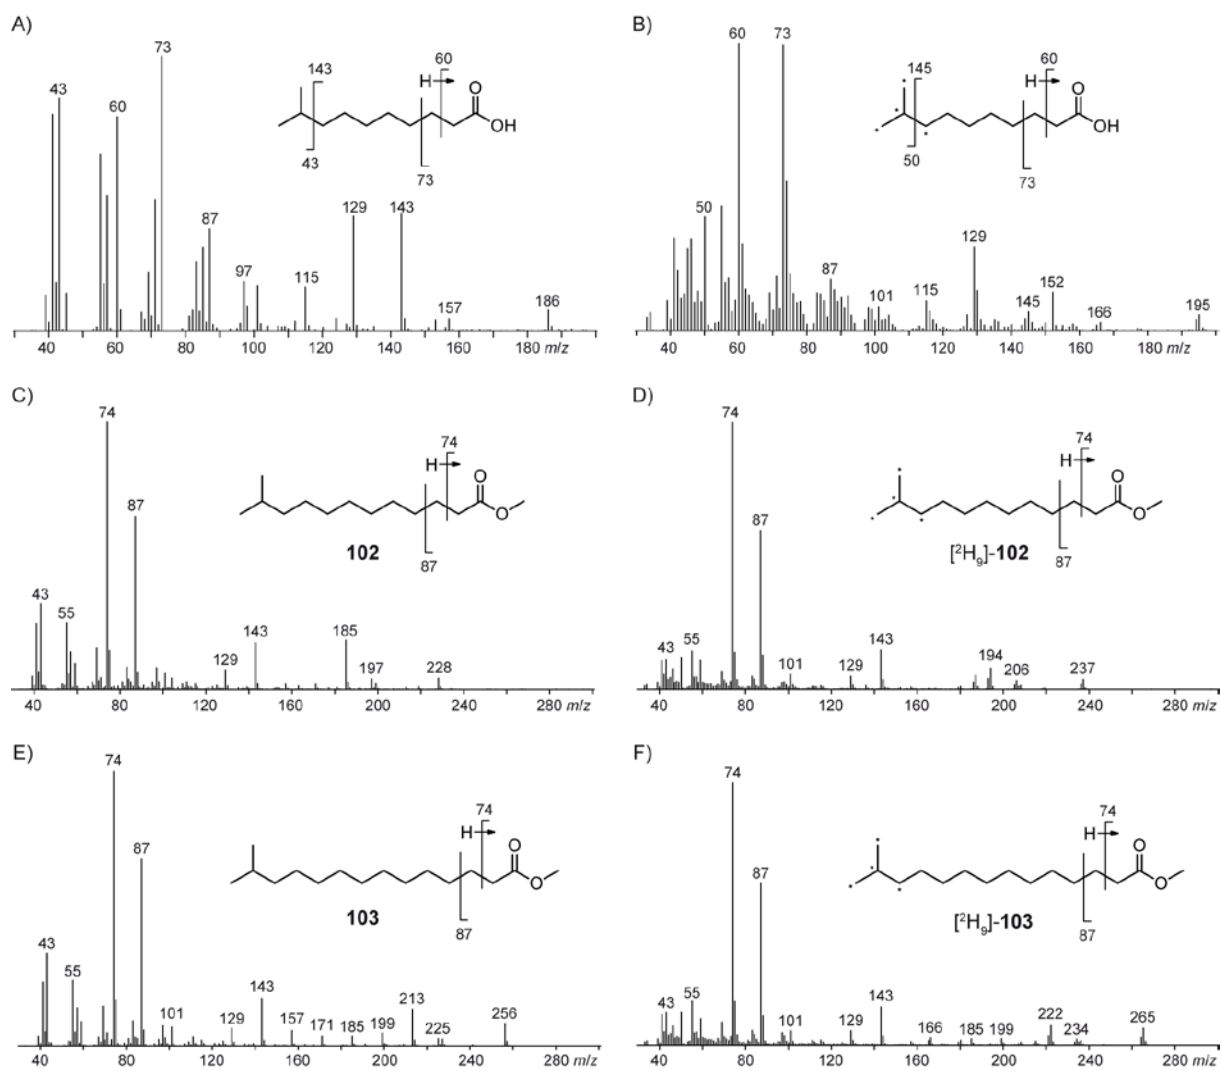

**Figure S3:** Mass spectra of 9-methyldecanoic acid (A), of  $[^2\text{H}_9]$ -9-methyldecanoic acid after feeding of  $[^2\text{H}_{10}]$ leucine (B), of **102** (C), of  $[^2\text{H}_9]$ -**102** after feeding of  $[^2\text{H}_{10}]$ leucine (D), of **103** (E), and of  $[^2\text{H}_9]$ -**103** after feeding of  $[^2\text{H}_{10}]$ leucine (F).

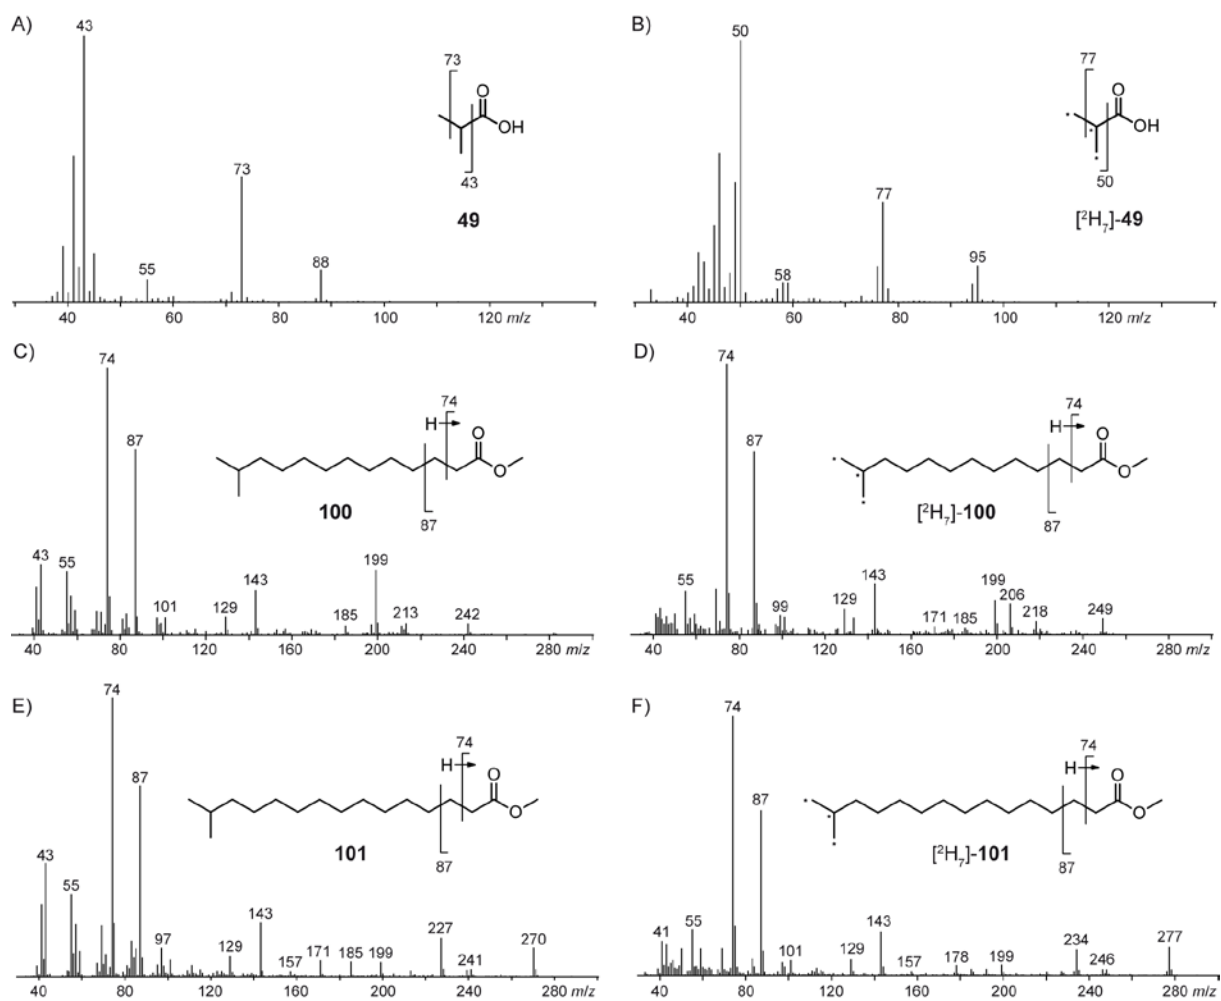

**Figure S4:** Mass spectra of **49** (A), of  $[\text{}^2\text{H}_7]\text{-49}$  after feeding of  $[\text{}^2\text{H}_8]\text{valine}$  (B), of **100** (C), of  $[\text{}^2\text{H}_7]\text{-100}$  after feeding of  $[\text{}^2\text{H}_8]\text{valine}$  (D), of **101** (E), and of  $[\text{}^2\text{H}_7]\text{-101}$  after feeding of  $[\text{}^2\text{H}_8]\text{valine}$  (F).

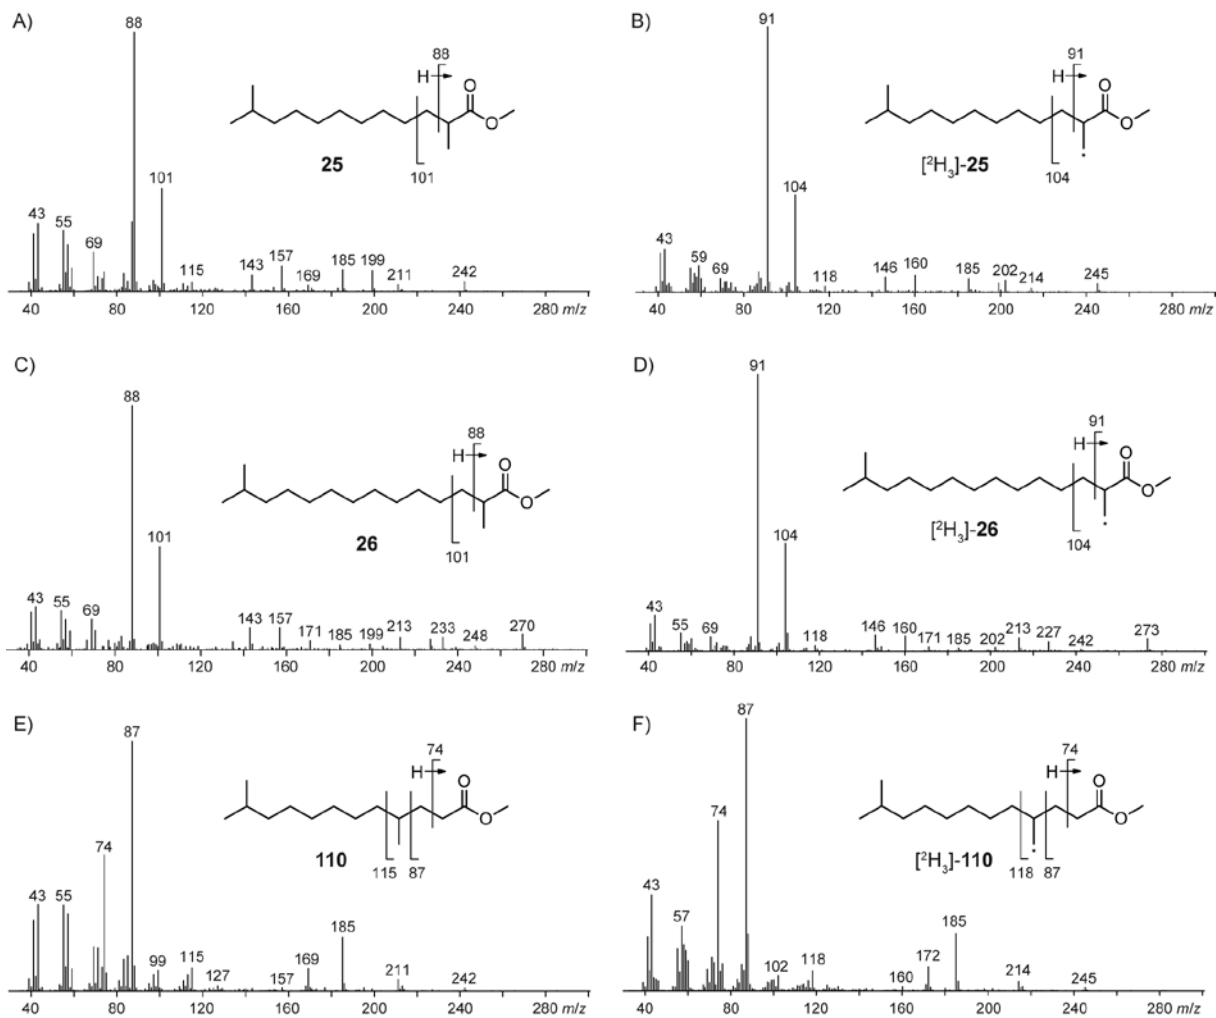

**Figure S5:** Mass spectra of **25** (A), of  $[^2\text{H}_3]$ -**25** after feeding of  $[^2\text{H}_5]$ sodium propionate (B), of **26** (C), of  $[^2\text{H}_3]$ -**26** after feeding of  $[^2\text{H}_5]$ sodium propionate (D), of **119** (E), and of  $[^2\text{H}_3]$ -**119** after feeding of  $[^2\text{H}_5]$ sodium propionate (F).

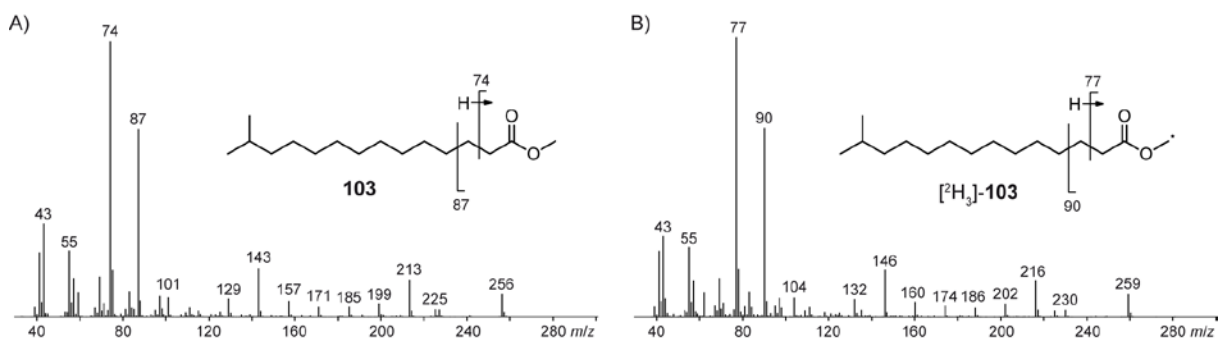

**Figure S6:** Mass spectra of **103** (A), and of  $[^2\text{H}_3]$ -**103** after feeding of [*methyl*- $^2\text{H}_3$ ]methionine (B).

**Strains, growth conditions, and feeding experiments:** *Micromonospora aurantiaca* ATCC 27029 was cultivated at 28°C in GYM 65 liquid medium (glucose: 4 g L<sup>-1</sup>, yeast extract: 4 g L<sup>-1</sup>, malt extract: 10 g L<sup>-1</sup>, agar: 12 g L<sup>-1</sup>, pH = 7.2) for 3 – 4 days. The GYM medium for the agar plates was additionally supplemented with calcium carbonate (2 g L<sup>-1</sup>). The agar plates were inoculated with 1000 µL of the preculture, and spiked for feeding experiments with 2 mM of the respective deuterated precursor ([<sup>2</sup>H<sub>10</sub>]-L-isoleucine, [<sup>2</sup>H<sub>10</sub>]-D,L-leucine, [<sup>2</sup>H<sub>8</sub>]-L-valine, [*methyl*-<sup>2</sup>H<sub>3</sub>]-L-methionine, or [<sup>2</sup>H<sub>5</sub>]sodium propionate), incubated for 2 – 3 days at 37°C, and then analysed by closed-loop stripping analysis (CLSA) at 37°C.

**Collection of volatiles [1]:** The volatiles emitted by the agar plate cultures were collected by use of a closed-loop stripping apparatus (CLSA). Therefore, a circulating air flow was directed through a charcoal filter (Chromtech GmbH, Idstein, Precision Charcoal Filter, 5 mg) in a closed apparatus containing the agar plate, for 24 h. The charcoal filter was extracted with 20 µL of analytically pure dichloromethane and the obtained solutions were immediately analysed by GC-MS.

**GC-MS:** GC-MS analyses were carried out on a HP7890A GC system connected to a HP5975C mass selective detector fitted with a HP-5 fused silica capillary column (30 m, 0.22 mm i. d., 0.25 µm film, Hewlett-Packard, Wilmington, USA). Conditions were as follows: inlet pressure: 67 kPa, He 23.3 mL min<sup>-1</sup>; injection volume 1 µL; injector 250°C; transfer line 300°C; electron energy 70 eV. The GC was programmed as follows: 50°C (5 min isothermic), increasing at 5°C min<sup>-1</sup> to 320°C. Retention indices were determined from a homologous series of n-alkanes (C8–C32). The identification of compounds was performed by comparison of mass spectra to database spectra. Chiral GC analyses were performed by using a hydrodex-6-TBDMS fused silica capillary column (50 m, 0.25 mm i.d., 0.25 µm film, Macherey-Nagel).

**General synthetic methods:** Chemicals were purchased from Acros Organics (Geel, Belgium) or Sigma Aldrich Chemie GmbH (Steinheim, Germany) and used without further purification. Solvents were purified by distillation and dried according to standard methods. For all general procedures, the relative amounts of the reagents are given as equivalents (eq.) referring to the molar ratios of the compounds, and the relative amounts of the solvents are given as the final

concentrations of the transformed starting material (set to 1.0 eq.). Thin-layer chromatography was performed with 0.2 mm precoated plastic sheets Polygram® Sil G/UV254 (Machery- Nagel). Column chromatography was carried out using Merck silica gel 60 (70–200 mesh).  $^1\text{H}$  NMR and  $^{13}\text{C}$  NMR spectra were recorded on a Bruker AMX400 spectrometer and IR spectra were recorded with a Bruker Tensor 27 ATR. GC-MS analyses were carried out with an Agilent 7890A connected to an Agilent 5975C inert mass detector fitted with a HP-5 MS or BPX-5 fused silica capillary column (25 m, 0.25 mm i. d., 0.25  $\mu\text{m}$  film). Instrumental parameters were (1) inlet pressure: 77.1 kPa, He 23.3 mL  $\text{min}^{-1}$ ; (2) injection volume: 2  $\mu\text{L}$ ; (3) transfer line: 300  $^\circ\text{C}$ ; and (4) electron energy: 70 eV. The GC was programmed as follows: 5 min at 50  $^\circ\text{C}$  increasing at 5  $^\circ\text{C min}^{-1}$  to 320  $^\circ\text{C}$ , and operated in splitless mode. The carrier gas was He at 1 mL  $\text{min}^{-1}$ . Retention indices  $I$  were determined from a homologous series of *n*-alkanes (C8–C38).

**General procedure for the preparation of methyl esters via 1,4-addition to methyl acrylate [2]:** To a solution of alkylmagnesium bromide, prepared from the alkyl bromide (1 M in THF, 1 eq.) and magnesium (1 eq.), DMAP (2 eq.) and  $\text{CuBr} \cdot \text{SMe}_2$  (1 eq.) were added. The mixture was cooled to  $-78^\circ\text{C}$  and a mixture of methyl acrylate (1 M in THF, 1 eq.) and  $\text{TMSCl}$  (2 M in THF, 2 eq.) was added dropwise over 30 min. After the mixture had been stirred for 3 h at  $-78^\circ\text{C}$ , diethyl ether and  $\text{HCl}$  (2 N) were added. The aqueous phase was separated and extracted three times with diethyl ether. The combined organic layers were dried with  $\text{MgSO}_4$ . The pure 1,4-adduct was obtained as a colourless liquid after solvent evaporation and column chromatography.

**Methyl 9-methyldecanoate (8):** Yield: 5.3 g (26.5 mmol, 73%); TLC (hexane/ethyl acetate = 10:1):  $R_f$  = 0.52; GC (HP-5 MS):  $I$  = 1385;  $^1\text{H}$ -NMR ( $\text{CDCl}_3$ , 400 MHz):  $\delta$  = 3.66 (s, 3H,  $\text{CH}_3$ ), 2.30 (t, 2H,  $^3J_{\text{H,H}}$  = 7.6 Hz,  $\text{CH}_2$ ), 1.62 (quint, 2H,  $^3J_{\text{H,H}}$  = 7.4 Hz,  $\text{CH}_2$ ), 1.51 (non, 1H,  $^3J_{\text{H,H}}$  = 6.6 Hz, CH), 1.30-1.25 (m, 8H, 4 x  $\text{CH}_2$ ), 1.17-1.12 (m, 2H,  $\text{CH}_2$ ), 0.86 (d, 6H,  $^3J_{\text{H,H}}$  = 6.6 Hz, 2 x  $\text{CH}_3$ ) ppm;  $^{13}\text{C}$ -NMR ( $\text{CDCl}_3$ , 100 MHz):  $\delta$  = 173.9 (C=O), 51.0 ( $\text{CH}_3$ ), 38.6 ( $\text{CH}_2$ ), 33.7 ( $\text{CH}_2$ ), 29.3 ( $\text{CH}_2$ ), 28.9 ( $\text{CH}_2$ ), 28.8 ( $\text{CH}_2$ ), 27.6 (CH), 27.0 ( $\text{CH}_2$ ), 24.6 ( $\text{CH}_2$ ), 22.2 (2 x  $\text{CH}_3$ ) ppm; MS (70 eV, EI):  $m/z$  (%) = 200 (3)  $[\text{M}]^+$ , 185 (1), 169 (6), 157 (19), 143 (16), 129 (7), 101 (13), 87 (70), 74 (100), 69 (18), 59 (20), 55 (41); IR (ATR):  $1/\lambda$  = 2952 (m), 2926 (s), 2885 (m), 1742 (s),

1465 (m), 1437 (m) 1366 (m), 1248 (m), 1198 (m), 1167 (s), 1115 (w), 1012 (w), 724 (w)  $\text{cm}^{-1}$ .

**Methyl 8-methyldecanoate (95):** Yield: 2.91 g (14.5 mmol, 52%); TLC (hexane/ethyl acetate = 20:1):  $R_f$  = 0.22; GC (HP-5 MS):  $I$  = 1392;  $^1\text{H-NMR}$  ( $\text{CDCl}_3$ , 400 MHz):  $\delta$  = 3.66 (s, 3H,  $\text{CH}_3$ ), 2.30 (t, 2H,  $^3J_{\text{H,H}}$  = 7.6 Hz,  $\text{CH}_2$ ), 1.62 (quint, 2H,  $^3J_{\text{H,H}}$  = 7.5 Hz,  $\text{CH}_2$ ), 1.37-1.23 (m, 9H, CH, 4 x  $\text{CH}_2$ ), 1.17-1.04 (m, 2H,  $\text{CH}_2$ ), 0.85 (t, 3H,  $^3J_{\text{H,H}}$  = 7.2 Hz,  $\text{CH}_3$ ), 0.84 (d, 3H,  $^3J_{\text{H,H}}$  = 6.4 Hz,  $\text{CH}_3$ ) ppm;  $^{13}\text{C-NMR}$  ( $\text{CDCl}_3$ , 100 MHz):  $\delta$  = 174.2 (C=O), 51.3 ( $\text{CH}_3$ ), 36.5 ( $\text{CH}_2$ ), 34.3 (CH), 34.1 ( $\text{CH}_2$ ), 29.6 ( $\text{CH}_2$ ), 29.4 ( $\text{CH}_2$ ), 29.2 ( $\text{CH}_2$ ), 26.8 ( $\text{CH}_2$ ), 24.9 ( $\text{CH}_2$ ), 19.1 ( $\text{CH}_3$ ), 11.3 ( $\text{CH}_3$ ) ppm; MS (70 eV, EI):  $m/z$  (%) = 200 (2)  $[\text{M}]^+$ , 171 (8), 143 (91), 139 (15), 115 (11), 97 (21), 87 (90), 74 (100), 69 (35), 59 (28) 57 (31), 55 (54), 43 (26), 41 (52); IR (ATR):  $1/\lambda$  = 2956 (m), 2926 (m), 2856 (m), 1741 (s), 1461 (m), 1436 (m), 1376 (w), 1249 (m), 1197 (m), 1166 (m), 1113 (m), 1101 (w), 877 (w), 726 (w)  $\text{cm}^{-1}$ .

**Methyl-4,8-dimethylundecanoate (114):** Yield: 0.95 g (0.42 mmol, 16%); TLC (hexane/ethyl acetate = 20:1):  $R_f$  = 0.23; GC (HP-5 MS):  $I$  = 1525;  $^1\text{H-NMR}$  ( $\text{CDCl}_3$ , 400 MHz):  $\delta$  = 3.67 (s, 3H,  $\text{CH}_3$ ), 2.38-2.24 (m, 2H,  $\text{CH}_2$ ), 1.71-1.61 (m, 1H, CH), 1.49-1.36 (m, 3H, CH,  $\text{CH}_2$ ), 1.33-1.19 (m, 8H, 4 x  $\text{CH}_2$ ), 1.13-1.04 (m, 2H,  $\text{CH}_2$ ), 0.88 (t, 3H,  $^3J_{\text{H,H}}$  = 7.1 Hz,  $\text{CH}_3$ ), 0.87 (d, 3H,  $^3J_{\text{H,H}}$  = 6.2 Hz,  $\text{CH}_3$ ) 0.84 (d, 3H,  $^3J_{\text{H,H}}$  = 6.6 Hz,  $\text{CH}_3$ ) ppm;  $^{13}\text{C-NMR}$  ( $\text{CDCl}_3$ , 100 MHz):  $\delta$  = 174.6 (C=O), 51.4 ( $\text{CH}_3$ ), 39.4 ( $\text{CH}_2$ ), 37.3 ( $\text{CH}_2$ ), 37.0 ( $\text{CH}_2$ ), 32.46 (CH), 32.42 (CH), 31.96 ( $\text{CH}_2$ ), 31.88 ( $\text{CH}_2$ ), 24.3 ( $\text{CH}_2$ ), 20.1 ( $\text{CH}_2$ ), 19.7 ( $\text{CH}_3$ ) 19.3 ( $\text{CH}_3$ ), 14.4 ( $\text{CH}_3$ ) ppm; MS (70 eV, EI):  $m/z$  (%) = 228 (1)  $[\text{M}^+]$ , 213 (<1), 199 (3), 171 (13), 157 (16), 155 (14), 115 (8), 97 (9), 87 (100), 74 (39), 69 (19), 55 (31), 43 (30), 41 (20); HRMS Calcd. for  $\text{C}_{14}\text{H}_{28}\text{O}_2$ : 228.20893; found: 228.21124; IR (ATR):  $1/\lambda$  = 2955 (m), 2926 (s), 2870 (m), 1742 (s), 1460 (m), 1436 (m), 1378 (m), 1255 (w), 1194 (m), 1168 (s), 1117 (w), 1018 (w), 992 (w), 740 (w)  $\text{cm}^{-1}$ .

**Methyl 6-methylheptanoate (118a):** Yield: 8.4 g (53.1 mmol, 53%); TLC (hexane/ethyl acetate = 5:1):  $R_f$  = 0.36; GC (HP-5 MS):  $I$  = 1086;  $^1\text{H-NMR}$  ( $\text{CDCl}_3$ , 400 MHz):  $\delta$  = 3.67 (s, 3H,  $\text{CH}_3$ ), 2.31 (t, 2H,  $^3J_{\text{H,H}}$  = 7.5 Hz,  $\text{CH}_2$ ), 1.61 (quint, 2H,  $^3J_{\text{H,H}}$  = 7.5 Hz,  $\text{CH}_2$ ), 1.53 (non, 1H,  $^3J_{\text{H,H}}$  = 6.6 Hz, CH), 1.35-1.27 (m, 2H,  $\text{CH}_2$ ), 1.21-1.15 (m, 2H,  $\text{CH}_2$ ), 0.87 (d, 6H,  $^3J_{\text{H,H}}$  = 6.6 Hz, 2 x  $\text{CH}_3$ ) ppm;  $^{13}\text{C-NMR}$  ( $\text{CDCl}_3$ ,



100 MHz):  $\delta = 174.3$  (C=O), 51.4 (CH<sub>3</sub>), 38.5 (CH<sub>2</sub>), 34.1 (CH<sub>2</sub>), 27.8 (CH), 26.9 (CH<sub>2</sub>), 25.1 (CH<sub>2</sub>), 22.5 (2 x CH<sub>3</sub>) ppm; MS (70 eV, EI):  $m/z$  (%) = 158 (1) [M]<sup>+</sup>, 143 (3), 127 (14), 115 (18), 109 (21), 87 (85), 83 (30), 82 (23), 74 (100), 69 (16), 59 (32), 57 (18), 55 (60); IR (ATR):  $1/\lambda = 2953$  (m), 2869 (m), 1740 (s), 1464 (m), 1436 (m), 1366 (m), 1239 (m), 1197 (m), 1168 (s), 1111 (w), 996 (w), 882 (w), 741 (w) cm<sup>-1</sup>.

**Methyl 5-methylheptanoate (118b):** Yield: 6.73 g (42.51 mmol, 66%); TLC (hexane/ethyl acetate = 20:1):  $R_f = 0.18$ ; GC (HP-5 MS):  $I = 1093$ ; <sup>1</sup>H-NMR (CDCl<sub>3</sub>, 400 MHz):  $\delta = 3.66$  (s, 3H, CH<sub>3</sub>), 2.29 (t, 2H, <sup>3</sup>J<sub>H,H</sub> = 7.5 Hz, CH<sub>2</sub>), 1.72-1.53 (m, 2H, CH<sub>2</sub>), 1.40-1.28 (m, 3H, CH, CH<sub>2</sub>), 1.18-1.09 (m, 2H, CH<sub>2</sub>), 0.86 (d, 3H, <sup>3</sup>J<sub>H,H</sub> = 6.5 Hz, CH<sub>3</sub>), 0.86 (t, 3H, <sup>3</sup>J<sub>H,H</sub> = 7.3 Hz, CH<sub>3</sub>) ppm; <sup>13</sup>C-NMR (CDCl<sub>3</sub>, 100 MHz):  $\delta = 174.0$  (C=O), 51.1 (CH<sub>3</sub>), 35.9 (CH<sub>2</sub>), 34.2 (CH<sub>2</sub>), 34.0 (CH), 29.1 (CH<sub>2</sub>), 22.4 (CH<sub>2</sub>), 18.8 (CH<sub>3</sub>), 11.1 (CH<sub>3</sub>) ppm; MS (70 eV, EI):  $m/z$  (%) = 158 (<1) [M]<sup>+</sup>, 143 (1), 129 (12), 115 (19), 109 (16), 101 (19), 87 (33), 74 (100), 69 (34), 59 (19), 55 (24), 41 (25); IR (ATR):  $1/\lambda = 2957$  (m), 2931 (m), 2874 (m), 1740 (s), 1460 (m), 1436 (m), 1377 (w), 1361 (w), 1244 (m), 1170 (s), 1110 (m), 1020 (w), 983 (w), 862 (w), 740 (w) cm<sup>-1</sup>.

**Methyl 6-methyloctanoate (121c):** Yield: 8.0 g (46.3 mmol, 65%); TLC (hexane/ethyl acetate = 10:1):  $R_f = 0.38$ ; GC (HP-5 MS):  $I = 1193$ ; <sup>1</sup>H-NMR (CDCl<sub>3</sub>, 400 MHz):  $\delta = 3.66$  (s, 3H, CH<sub>3</sub>), 2.31 (t, 2H, <sup>3</sup>J<sub>H,H</sub> = 7.5 Hz, CH<sub>2</sub>), 1.68-1.53 (m, 2H, CH<sub>2</sub>), 1.41-1.24 (m, 5H, 2 x CH<sub>2</sub>, CH), 1.18-1.06 (m, 2H, CH<sub>2</sub>), 0.85 (t, 3H, <sup>3</sup>J<sub>H,H</sub> = 8.0 Hz, CH<sub>3</sub>), 0.84 (d, 3H, <sup>3</sup>J<sub>H,H</sub> = 7.3 Hz, CH<sub>3</sub>) ppm; <sup>13</sup>C-NMR (CDCl<sub>3</sub>, 100 MHz):  $\delta = 173.9$  (C=O), 51.2 (CH<sub>3</sub>), 36.1 (CH<sub>2</sub>), 34.1 (CH), 34.0 (CH<sub>2</sub>), 29.3 (CH<sub>2</sub>), 26.5 (CH<sub>2</sub>), 25.1 (CH<sub>2</sub>), 19.0 (CH<sub>3</sub>), 11.2 (CH<sub>3</sub>) ppm; MS (70 eV, EI):  $m/z$  (%) = 172 (<1) [M]<sup>+</sup>, 157 (1), 143 (10), 123 (18), 115 (20), 96 (33), 87 (72), 83 (39), 74 (100), 69 (22), 59 (26), 55 (54), 43 (20), 41 (45); IR (ATR):  $1/\lambda = 2957$  (m), 2931 (m), 2872 (m), 1742 (s), 1460 (m), 1436 (m) 1376 (w), 1198 (m), 1168 (s), 1112 (m), 1011 (w), 822 (w), 734 (w) cm<sup>-1</sup>.

**Methyl 5-methyloctanoate (127):** Yield: 6.4 g (36.9 mmol, 44%); TLC (hexane/ethyl acetate = 20:1):  $R_f = 0.20$ ; GC (BPX-5):  $I = 1190$ ; <sup>1</sup>H-NMR (CDCl<sub>3</sub>, 400 MHz):  $\delta = 3.66$  (s, 3H, CH<sub>3</sub>), 2.29 (t, 2H, <sup>3</sup>J<sub>H,H</sub> = 7.7 Hz, CH<sub>2</sub>), 1.72-1.53 (m, 2H, CH<sub>2</sub>), 1.46-1.37 (m, 1H, CH), 1.36-1.21 (m, 2H, 2 x CH<sub>2</sub>), 1.17-1.06 (m, 2H, CH<sub>2</sub>), 0.88 (t, 3H, <sup>3</sup>J<sub>H,H</sub> =

7.0 Hz, CH<sub>3</sub>), 0.86 (d, 3H, <sup>3</sup>J<sub>H,H</sub> = 6.6 Hz, CH<sub>3</sub>) ppm; <sup>13</sup>C-NMR (CDCl<sub>3</sub>, 100 MHz): δ = 174.1 (C=O), 51.3 (CH<sub>3</sub>), 39.1 (CH<sub>2</sub>), 36.4 (CH<sub>2</sub>), 34.4 (CH<sub>2</sub>), 32.2 (CH), 22.4 (CH<sub>2</sub>), 20.0 (CH<sub>2</sub>), 19.4 (CH<sub>3</sub>), 14.2 (CH<sub>3</sub>) ppm; MS (70 eV, EI): *m/z* (%) = 172 (<1) [M]<sup>+</sup>, 157 (1), 141 (5), 129 (38), 123 (13), 101 (19), 97 (20), 87 (34), 74 (100), 69 (35), 59 (24), 55 (33), 43 (38), 41 (39); IR (ATR): 1/λ = 2955 (m), 2928 (m), 2872 (m), 1741 (s), 1460 (m), 1437 (m), 1378 (w), 1361 (w), 1248 (m), 1198 (m), 1169 (s), 1112 (m), 1015 (w), 874 (w), 742 (w) cm<sup>-1</sup>.

**General procedure for the preparation of alcohols via reduction:** A solution of the ester (0.8 M in Et<sub>2</sub>O, 1 eq.) was added to a suspension of LiAlH<sub>4</sub> (0.2 M in Et<sub>2</sub>O, 0.75 eq.). After being heated under reflux for 12 h the mixture was cooled to 0°C and H<sub>2</sub>O was added slowly until the H<sub>2</sub> formation stopped. One spatula of MgSO<sub>4</sub> was added and the mixture was stirred vigorously for 10 min. The precipitate was filtered off and the filter cake was washed excessively with Et<sub>2</sub>O. After solvent evaporation and column chromatography on silica gel the pure alcohol was afforded as a colourless liquid.

**6-Methylheptan-1-ol (119a):** Yield: 5.72 g (43.9 mmol, 91%); TLC (hexane/ethyl acetate = 2:1): *R<sub>f</sub>* = 0.27; GC (BPX-5): *I* = 1050; <sup>1</sup>H-NMR (CDCl<sub>3</sub>, 400 MHz): δ = 3.61 (t, 2H, <sup>3</sup>J<sub>H,H</sub> = 6.7 Hz, CH<sub>2</sub>), 2.47 (s br, 1H, OH), 1.56 (quint, 2H, <sup>3</sup>J<sub>H,H</sub> = 7.0 Hz, CH<sub>2</sub>), 1.53 (non, 1H, <sup>3</sup>J<sub>H,H</sub> = 6.6 Hz, CH), 1.35-1.27 (m, 4H, 2 x CH<sub>2</sub>), 1.44-1.20 (m, 2H, CH<sub>2</sub>), 0.87 (d, 6H, <sup>3</sup>J<sub>H,H</sub> = 6.7 Hz, 2 x CH<sub>3</sub>) ppm; <sup>13</sup>C-NMR (CDCl<sub>3</sub>, 100 MHz): δ = 62.7 (CH<sub>2</sub>), 38.9 (CH<sub>2</sub>), 32.7 (CH<sub>2</sub>), 27.8 (CH), 27.1 (CH<sub>2</sub>), 26.0 (CH<sub>2</sub>), 22.5 (2 x CH<sub>3</sub>) ppm; MS (70 eV, EI): *m/z* (%) = 130 (<1) [M]<sup>+</sup>, 97 (26), 84 (23), 83 (8), 70 (32), 69 (84), 68 (26), 57 (41), 56 (100), 55 (91), 53 (9); IR (ATR): 1/λ = 3322 (m br), 2953 (s), 2928 (s), 2866 (m), 1465 (m), 1384 (w), 1366 (w), 1053 (s), 1029 (m), 985 (w), 726 (w) cm<sup>-1</sup>.

**5-Methylheptan-1-ol (119b):** Yield: 4.54 g (34.20 mmol, 83%); GC (BPX-5): *I* = 1057; <sup>1</sup>H-NMR (CDCl<sub>3</sub>, 400 MHz): δ = 3.61 (dt, 2H, <sup>3</sup>J<sub>H,H</sub> = 6.4 Hz, 5.3 Hz, CH<sub>2</sub>), 2.61 (t, 1H, <sup>3</sup>J<sub>H,H</sub> = 5.2 Hz, OH), 1.60-1.49 (m, 2H, CH<sub>2</sub>), 1.41-1.26 (m, 5H, CH, 2 x CH<sub>2</sub>), 1.19-1.09 (m, 2H, CH<sub>2</sub>), 0.86 (t, 3H, <sup>3</sup>J<sub>H,H</sub> = 7.3 Hz, CH<sub>3</sub>), 0.85 (d, 3H, <sup>3</sup>J<sub>H,H</sub> = 6.3 Hz, CH<sub>3</sub>) ppm; <sup>13</sup>C-NMR (CDCl<sub>3</sub>, 100 MHz): δ = 62.7 (CH<sub>2</sub>), 36.3 (CH<sub>2</sub>), 34.3 (CH), 33.0 (CH<sub>2</sub>), 29.3 (CH<sub>2</sub>), 23.2 (CH<sub>2</sub>), 19.0 (CH<sub>3</sub>), 11.2 (CH<sub>3</sub>) ppm; MS (70 eV, EI): *m/z* (%) =

130 (<1) [M]<sup>+</sup>, 112 (<1), 97 (8), 84 (24), 83 (97), 70 (45), 69 (21), 56 (38), 55 (100), 43 (19), 41 (52), 39 (16); IR (ATR):  $1/\lambda = 3323$  (m br), 2959 (m), 2930 (s), 2871 (m), 1460 (m), 1377 (m), 1124 (w), 1054 (m), 927 (w), 769 (w), 645 (w) cm<sup>-1</sup>.

**5-Methyloctan-1-ol (128):** Yield: 0.94 g (6.52 mmol, 91%); TLC (hexane/ethyl acetate = 5:1):  $R_f = 0.18$ ; GC (BPX-5):  $I = 1078$ ; <sup>1</sup>H-NMR (CDCl<sub>3</sub>, 400 MHz):  $\delta = 3.64$  (t, 2H, <sup>3</sup>J<sub>H,H</sub> = 6.6 Hz, CH<sub>2</sub>), 1.59 (s br, 1H, OH), 1.57-1.51 (m, 2H, CH<sub>2</sub>), 1.44-1.21 (m, 7H, CH, 3 x CH<sub>2</sub>), 1.17-1.04 (m, 2H, CH<sub>2</sub>), 0.88 (t, 3H, <sup>3</sup>J<sub>H,H</sub> = 7.0 Hz, CH<sub>3</sub>), 0.85 (d, 3H, <sup>3</sup>J<sub>H,H</sub> = 6.5 Hz, CH<sub>3</sub>) ppm; <sup>13</sup>C-NMR (CDCl<sub>3</sub>, 100 MHz):  $\delta = 63.0$  (CH<sub>2</sub>), 39.3 (CH<sub>2</sub>), 36.8 (CH<sub>2</sub>), 33.1 (CH<sub>2</sub>), 32.4 (CH), 23.2 (CH<sub>2</sub>), 20.1 (CH<sub>2</sub>), 19.6 (CH<sub>3</sub>), 14.3 (CH<sub>3</sub>) ppm; MS (70 eV, EI):  $m/z$  (%) = 144 (<1) [M]<sup>+</sup>, 126 (<1), 111 (3), 97 (22), 84 (41), 83 (98), 70 (32), 69 (33), 56 (46), 55 (100), 43 (49), 41 (43); IR (ATR):  $1/\lambda = 3327$  (w br), 2956 (m), 2929 (s), 2868 (m), 1461 (m), 1378 (m), 1125 (w), 1055 (m), 909 (w), 734 (s), 646 (w) cm<sup>-1</sup>.

**General procedure for the preparation of bromides:** Bromine (1.33 eq.) was added dropwise to a solution of triphenylphosphane (0.7 M in dichloromethane, 1.33 eq.) at 0°C until the yellow colour persisted. The alcohol (in dichloromethane) was added in one batch. After being stirred for 2 h at 0°C, the reaction mixture was diluted with diethyl ether and washed with saturated NaHSO<sub>3</sub> solution to remove excess bromine. The aqueous phase was separated and extracted three times with diethyl ether. The combined organic layers were dried with MgSO<sub>4</sub>, filtered and 2/3 of the solvents were evaporated. Pentane was added and the precipitated triphenylphosphane oxide was filtered off. Evaporation of the solvents and column chromatography provided the pure bromide as a colourless liquid.

**1-Bromo-6-methylheptane (120a):** Yield: 7.04 g (36.5 mmol, 85%); TLC (hexane/ethyl acetate = 10:1):  $R_f = 0.96$ ; GC (BPX-5):  $I = 1116$ ; <sup>1</sup>H-NMR (CDCl<sub>3</sub>, 400 MHz):  $\delta = 3.34$  (t, 2H, <sup>3</sup>J<sub>H,H</sub> = 6.9 Hz, CH<sub>2</sub>), 1.79 (quint, 2H, <sup>3</sup>J<sub>H,H</sub> = 7.0 Hz, CH<sub>2</sub>), 1.46 (non, 1H, <sup>3</sup>J<sub>H,H</sub> = 6.6 Hz, CH), 1.38-1.30 (m, 2H, CH<sub>2</sub>), 1.27-1.19 (m, 2H, CH<sub>2</sub>), 1.13-1.08 (m, 2H, CH<sub>2</sub>), 0.80 (d, 6H, <sup>3</sup>J<sub>H,H</sub> = 6.7 Hz, 2 x CH<sub>3</sub>) ppm; <sup>13</sup>C-NMR (CDCl<sub>3</sub>, 100 MHz):  $\delta = 39.1$  (CH<sub>2</sub>), 34.3 (CH<sub>2</sub>), 33.2 (CH<sub>2</sub>), 28.7 (CH<sub>2</sub>), 28.2 (CH), 26.8 (CH<sub>2</sub>), 22.9 (2 x CH<sub>3</sub>) ppm; MS (70 eV, EI):  $m/z$  (%) = 193 (<1) [M]<sup>+</sup>, 149 (77), 147 (79), 137 (13), 135 (14), 109 (5), 107 (5), 97 (21), 69 (56), 57 (23), 55 (57), 43 (87), 41 (100); IR

(ATR):  $1/\lambda = 2954$  (m), 2929 (s), 2866 (m), 1464 (m), 1384 (w), 1367 (w), 1260 (w), 1230 (w), 1170 (w), 1096 (w), 1019 (w), 804 (m), 728 (w), 647 (w), 564 (m)  $\text{cm}^{-1}$ .

**1-Bromo-5-methylheptane (120b):** Yield: 5.66 g (29.31 mmol, 91%); TLC (pentane/diethylether = 10:1):  $R_f = 0.86$ ; GC (BPX-5):  $I = 1122$ ;  $^1\text{H-NMR}$  ( $\text{CDCl}_3$ , 400 MHz):  $\delta = 3.41$  (t, 1H,  $^3J_{\text{H,H}} = 6.9$  Hz,  $\text{CH}_2$ ), 1.88-1.80 (m, 2H,  $\text{CH}_2$ ), 1.52-1.38 (m, 2H,  $\text{CH}_2$ ), 1.37-1.27 (m, 3H, CH,  $\text{CH}_2$ ), 1.18-1.08 (m, 2H,  $\text{CH}_2$ ), 0.86 (t, 3H,  $^3J_{\text{H,H}} = 7.3$  Hz,  $\text{CH}_3$ ), 0.86 (d, 3H,  $^3J_{\text{H,H}} = 6.5$  Hz,  $\text{CH}_3$ ) ppm;  $^{13}\text{C-NMR}$  ( $\text{CDCl}_3$ , 100 MHz):  $\delta = 36.6$  ( $\text{CH}_2$ ), 34.2 (CH), 33.9 ( $\text{CH}_2$ ), 33.1 ( $\text{CH}_2$ ), 29.4 ( $\text{CH}_2$ ), 25.7 ( $\text{CH}_2$ ), 19.1 ( $\text{CH}_3$ ), 11.3 ( $\text{CH}_3$ ) ppm; MS (70 eV, EI):  $m/z$  (%) = 192 (<1)  $[\text{M}]^+$ , 165 (8), 163 (8), 137 (99), 135 (100), 123 (5), 121 (5), 109 (5), 107 (6), 97 (5), 95 (4), 83 (59), 57 (52), 55 (77), 41 (68), 39 (26); IR (ATR):  $1/\lambda = 2960$  (s), 2931 (m), 2871 (m), 1460 (m), 1378 (w), 1251 (w), 1202 (w), 976 (w), 770 (w), 732 (w), 648 (m), 564 (m)  $\text{cm}^{-1}$ .

**1-Bromo-3-methylpentane (120c):** Yield: 13.8 g (83.3 mmol, 71%); TLC (hexane/ethyl acetate = 10:1):  $R_f = 0.86$ ; GC (BPX-5):  $I = 911$ ;  $^1\text{H-NMR}$  ( $\text{CDCl}_3$ , 400 MHz):  $\delta = 3.37$  (ddd, 1H,  $^3J_{\text{H,H}} = 9.9$  Hz, 8.1 Hz, 5.9 Hz,  $\text{CHH}$ ), 3.40 (dt, 1H,  $^3J_{\text{H,H}} = 9.8$  Hz, 7.6 Hz,  $\text{CHH}$ ), 1.93-1.83 (m, 1H  $\text{CHH}$ ), 1.67 (dtd, 1H,  $^3J_{\text{H,H}} = 13.7$  Hz, 7.8 Hz, 5.9 Hz,  $\text{CHH}$ ), 1.56 (oct, 1H,  $^3J_{\text{H,H}} = 6.5$  Hz, CH), 1.42-1.32 (m, 2H,  $\text{CHH}$ ), 1.39-1.26 (m, 1H,  $\text{CHH}$ ), 0.89 (t, 3H,  $^3J_{\text{H,H}} = 7.4$  Hz,  $\text{CH}_3$ ), 0.88 (d,  $^3J_{\text{H,H}} = 6.6$  Hz,  $\text{CH}_3$ ) ppm;  $^{13}\text{C-NMR}$  ( $\text{CDCl}_3$ , 100 MHz):  $\delta = 39.6$  ( $\text{CH}_2$ ), 33.2 (CH), 32.2 ( $\text{CH}_2$ ), 28.9 ( $\text{CH}_2$ ), 18.4 ( $\text{CH}_3$ ), 11.1 ( $\text{CH}_3$ ) ppm; MS (70 eV, EI):  $m/z$  (%) = 165 (<1)  $[\text{M}]^+$ , 164 (5)  $[\text{M}-1]^+$ , 137 (4), 135 (4), 109 (6), 107 (6), 85 (99), 84 (45), 69 (42), 57 (100), 55 (85), 41 (78), 39 (33); IR (ATR):  $1/\lambda = 2962$  (m), 2927 (m), 2874 (m), 1461 (m), 1379 (w), 1255 (m), 1215 (w), 1154 (w), 1038 (w), 1002 (w), 965 (w), 877 (w), 776 (w), 643 (m), 566 (m)  $\text{cm}^{-1}$ .

**1-Bromo-2-methylpentane (126):** Yield: 14.7 g (89.3 mmol, 76%); TLC (hexane/ethyl acetate = 10:1):  $R_f = 0.92$ ; GC (BPX-5):  $I = 903$ ;  $^1\text{H-NMR}$  ( $\text{CDCl}_3$ , 400 MHz):  $\delta = 3.40$  (dd, 1H,  $^3J_{\text{H,H}} = 4.9$  Hz,  $^2J_{\text{H,H}} = 9.8$  Hz,  $\text{CHH}$ ), 3.32 (dd, 1H,  $^3J_{\text{H,H}} = 6.2$  Hz,  $^2J_{\text{H,H}} = 9.8$  Hz,  $\text{CHH}$ ), 1.80 (oct, 1H,  $^3J_{\text{H,H}} = 6.4$  Hz, CH), 1.47-1.46 (m, 4H, 2 x  $\text{CH}_2$ ), 1.01 (d, 3H,  $^3J_{\text{H,H}} = 6.7$  Hz,  $\text{CH}_3$ ), 0.91 (t, 3H,  $^3J_{\text{H,H}} = 7.1$  Hz,  $\text{CH}_3$ ) ppm;  $^{13}\text{C-NMR}$  ( $\text{CDCl}_3$ , 100 MHz):  $\delta = 41.5$  ( $\text{CH}_2$ ), 37.1 ( $\text{CH}_2$ ), 34.9 (CH), 20.0 ( $\text{CH}_2$ ), 18.7

(CH<sub>3</sub>), 14.1 (CH<sub>3</sub>) ppm; MS (70 eV, EI):  $m/z$  (%) = 165 (<1) [M]<sup>+</sup>, 164 (2) [M-1]<sup>+</sup>, 123 (6), 121 (6), 95 (4), 93 (4), 86 (7), 85 (100), 71 (18), 69 (12), 57 (9), 55 (18), 43 (62), 41 (49), 39 (25); IR (ATR):  $1/\lambda$  = 2959 (s), 2929 (m), 2872 (m), 1460 (m), 1379 (m), 1322 (w), 1247 (w), 1228 (m), 947 (w), 845 (w), 813 (w), 739 (w), 650 (s), 619 (m), 553 (w) cm<sup>-1</sup>.

**2-Bromo-6-methylnonane (131):** Yield: 1.03 g (4.58 mmol, 87%); TLC (pentane/diethyl ether = 10:1):  $R_f$  = 0.88; GC (BPX-5):  $I$  = 1257; <sup>1</sup>H-NMR (CDCl<sub>3</sub>, 400 MHz):  $\delta$  = 4.14 (sextt, 1H, <sup>3</sup> $J_{H,H}$  = 6.6 Hz, <sup>4</sup> $J_{H,H}$  = 1.8 Hz, CH), 1.87-1.73 (m, 3H, CH, CH<sub>2</sub>), 1.71 (d, 3H, <sup>3</sup> $J_{H,H}$  = 7.0 Hz, CH<sub>3</sub>), 1.49-1.21 (m, 6H, 3 x CH<sub>2</sub>), 1.17-1.05 (m, 2H, CH<sub>2</sub>), 0.88 (t, 3H, <sup>3</sup> $J_{H,H}$  = 7.0 Hz, CH<sub>3</sub>), 0.86 (d, 3H, <sup>3</sup> $J_{H,H}$  = 6.6 Hz, CH<sub>3</sub>) ppm; <sup>13</sup>C-NMR (CDCl<sub>3</sub>, 100 MHz):  $\delta$  = 52.0 (CH), 41.5 (CH<sub>2</sub>), 39.3 (CH<sub>2</sub>), 36.3 (CH<sub>2</sub>), 32.4 (CH), 26.5 (CH<sub>3</sub>), 25.3 (CH<sub>2</sub>), 20.1 (CH<sub>2</sub>), 19.6 (CH<sub>3</sub>), 14.4 (CH<sub>3</sub>) ppm; MS (70 eV, EI):  $m/z$  (%) = 221 (<1) [M]<sup>+</sup>, 179 (2), 177 (2), 151 (59), 149 (60), 141 (23), 99 (18), 97 (40), 85 (78), 71 (86), 69 (51), 57 (66), 55 (100), 43 (86), 41 (68); IR (ATR):  $1/\lambda$  = 2956 (s), 2926 (m), 2869 (m), 1458 (m), 1378 (m), 1230 (w), 1213 (w), 1146 (w), 1098 (w), 961 (w), 740 (w), 620 (w), 543 (m) cm<sup>-1</sup>.

**General procedure for  $\alpha$ -methylation of esters:** To a cooled (0°C) solution of diisopropylamine (0.13 M in THF, 1.1 eq.) *n*-butyllithium (1.6 M in Hexan, 1.1 eq.) was added slowly and stirred for 1 h at 0°C. After being cooled to -78°C the ester (1 eq.) was added and the solution was stirred for 30 min. Iodomethane was added dropwise and the reaction mixture stirred for 2 h at -78°C. The mixture was allowed to warm to room temperature, the reaction was quenched with saturated NH<sub>4</sub>Cl solution, and the layers were separated. The aqueous layer was extracted with Et<sub>2</sub>O, the combined organic layers were dried over MgSO<sub>4</sub>, filtered, and the solvents were evaporated. Column chromatography of the residue on silica gel afforded the methylated ester as a colourless liquid.

**Methyl 2-methyldecanoate (10):** Yield: 5.28 g (26.4 mmol, 82%); TLC (hexane/ethyl acetate = 20:1):  $R_f$  = 0.37; GC (HP-5 MS):  $I$  = 1357; <sup>1</sup>H-NMR (CDCl<sub>3</sub>, 400 MHz):  $\delta$  = 3.67 (s, 3H, CH<sub>3</sub>), 2.43 (sext, 1H, <sup>3</sup> $J_{H,H}$  = 6.9 Hz, CH), 1.69-1.60 (m, 1H, CHH), 1.44-1.36 (m, 1H, CHH), 1.30-1.24 (m, 12H, 6 x CH<sub>2</sub>), 1.14 (d, 3H, <sup>3</sup> $J_{H,H}$  = 7.0 Hz, CH<sub>3</sub>), 0.88 (t, 3H, <sup>3</sup> $J_{H,H}$  = 6.8 Hz, CH<sub>3</sub>) ppm; <sup>13</sup>C-NMR (CDCl<sub>3</sub>, 100 MHz):  $\delta$  = 177.3 (C=O),

51.3 (CH<sub>3</sub>), 39.4 (CH), 33.8 (CH<sub>2</sub>), 31.8 (CH<sub>2</sub>), 29.5 (CH<sub>2</sub>), 29.4 (CH<sub>2</sub>), 29.2 (CH<sub>2</sub>), 27.2 (CH<sub>2</sub>), 22.6 (CH<sub>2</sub>), 17.0 (CH<sub>3</sub>), 14.0 (CH<sub>3</sub>) ppm; MS (70 eV, EI): *m/z* (%) = 200 (<1) [M]<sup>+</sup>, 157 (5), 143 (6), 101 (27), 88 (100), 69 (6), 57 (15), 55 (13); IR (ATR): 1/λ = 2925 (s), 2856 (m), 1738 (s), 1462 (m), 1435 (m), 1377 (w), 1195 (s), 1164 (s), 1092 (w), 987 (w), 835 (w), 713 (w) cm<sup>-1</sup>.

**Methyl 2,9-dimethyldecanoate (24):** Yield: 2.29 g (10.67 mmol, 79%); TLC (hexane/ethyl acetate = 10:1): *R<sub>f</sub>* = 0.50; GC (HP-5 MS): *I* = 1419; <sup>1</sup>H-NMR (CDCl<sub>3</sub>, 400 MHz): δ = 3.66 (d, 3H, <sup>4</sup>*J*<sub>H,H</sub> = 0.5 Hz, CH<sub>3</sub>), 2.44 (sext, 1H, <sup>3</sup>*J*<sub>H,H</sub> = 7.0 Hz, CH), 1.69-1.60 (m, 1H, CHH), 1.51 (non, 1H, <sup>3</sup>*J*<sub>H,H</sub> = 6.6 HZ, CH), 1.44-1.36 (m, 1H, CHH), 1.31-1.24 (m, 8H, 4 x CH<sub>2</sub>), 1.17-1.12 (m, 5H, CH<sub>2</sub>, CH<sub>3</sub>), 0.86 (d, 6H, <sup>3</sup>*J*<sub>H,H</sub> = 6.6 Hz, 2 x CH<sub>3</sub>) ppm; <sup>13</sup>C-NMR (CDCl<sub>3</sub>, 100 MHz): δ = 177.4 (C=O), 51.4 (CH<sub>3</sub>), 39.4 (CH), 39.0 (CH<sub>2</sub>), 33.8 (CH<sub>2</sub>), 29.7 (CH<sub>2</sub>), 29.5 (CH<sub>2</sub>), 27.9 (CH), 27.3 (CH<sub>2</sub>), 27.2 (CH<sub>2</sub>), 22.6 (CH<sub>3</sub>), 17.0 (CH<sub>3</sub>) ppm; MS (70 eV, EI): *m/z* (%) = 214 (5) [M]<sup>+</sup>, 199 (1), 183 (4), 171 (11), 157 (18), 143 (12), 115 (4), 101 (53), 88 (100), 69 (19), 59 (21), 57 (20), 55 (28), 43 (44), 41 (46); HRMS Calcd. for C<sub>13</sub>H<sub>26</sub>O<sub>2</sub>: 214.19328; found: 214.19503; IR (ATR): 1/λ = 2926 (s), 2856 (m), 1739 (s), 1463 (m), 1436 (m), 1366 (m), 1249 (m), 1195 (s), 1165 (s), 1090 (w), 989 (w), 835 (w), 760 (w), 724 (w) cm<sup>-1</sup>.

**Methyl 2,6-dimethyloctanoate (122c):** Yield: 7.00 g (37.6 mmol, 85%); TLC (hexane/ethyl acetate = 20:1): *R<sub>f</sub>* = 0.36; GC (BPX-5): *I* = 1228; <sup>1</sup>H-NMR (CDCl<sub>3</sub>, 400 MHz): δ = 3.66 (d, 3H, <sup>4</sup>*J*<sub>H,H</sub> = 0.9 Hz, CH<sub>3</sub>), 2.44 (sext, 1H, <sup>3</sup>*J*<sub>H,H</sub> = 6.9 Hz, CH), 1.69-1.58 (m, 1H, CH), 1.43-1.21 (m, 6H, 3 x CH<sub>2</sub>), 1.14 (d, 3H, <sup>3</sup>*J*<sub>H,H</sub> = 7.0 Hz, CH<sub>3</sub>), 1.13-1.05 (m, 2H, CH<sub>2</sub>), 0.85 (t, <sup>3</sup>*J*<sub>H,H</sub> = 6.9 Hz, CH<sub>3</sub>), 0.84 (d, 3H, <sup>3</sup>*J*<sub>H,H</sub> = 5.8 Hz, CH<sub>3</sub>) ppm; <sup>13</sup>C-NMR (CDCl<sub>3</sub>, 100 MHz): δ = 177.2 (C=O), 51.2 (CH<sub>3</sub>), 39.4 (CH), 36.3 (CH<sub>2</sub>), 34.14 (CH), 34.06 (CH<sub>2</sub>), 29.3 (CH<sub>2</sub>), 24.6 (CH<sub>2</sub>), 19.0 (CH<sub>3</sub>), 17.0 (CH<sub>3</sub>), 11.2 (CH<sub>3</sub>) ppm; MS (70 eV, EI): *m/z* (%) = 186 (2) [M]<sup>+</sup>, 171 (1), 157 (16), 129 (8), 115 (4), 101 (48), 97 (20), 88 (100), 69 (17), 57 (19), 55 (27), 41 (28); IR (ATR): 1/λ = 2958 (m), 2934 (m), 2874 (m), 1738 (s), 1461 (m), 1435 (m), 1377 (m), 1256 (m), 1201 (m), 1169 (s), 1150 (s), 826 (w), 764 (w), 735 (w) cm<sup>-1</sup>.

**General procedure for the reduction of esters to aldehydes:** A solution of the ester (0.4 M in Et<sub>2</sub>O, 1 eq.) was cooled to -78°C and DIBAH (1 M in Hexan, 1.4 eq.) was added slowly. The reaction was monitored with TLC and upon completion of the

reaction the solution was poured into an ice-cold, stirred solution of HCl (4 N). After separation of the layers the aqueous phase was extracted three times with Et<sub>2</sub>O. The combined organic layers were dried with MgSO<sub>4</sub>, filtered, and the solvents were evaporated. Column chromatography of the residue on silica gel afforded the aldehyde as a colourless liquid.

**2,9-Dimethyldecanal (123a):** Yield: 0.98 g (5.33 mmol, 54%); TLC (hexane/ethyl acetate = 20:1):  $R_f$  = 0.24; GC (BPX-5):  $I$  = 1342; <sup>1</sup>H-NMR (CDCl<sub>3</sub>, 400 MHz):  $\delta$  = 9.61 (d, 1H, <sup>3</sup> $J_{H,H}$  = 2.0 Hz, CHO), 1.73-1.64 (m, 1H, CH), 1.51 (non, 1H, <sup>3</sup> $J_{H,H}$  = 6.6 Hz, CH), 1.47-1.39 (m, 1H, CHH), 1.36-1.22 (m, 9H, CHH, 4 x CH<sub>2</sub>), 1.18 (d, 3H, <sup>3</sup> $J_{H,H}$  = 7.0 Hz, CH<sub>3</sub>), 1.17-1.12 (m, 2H, CH<sub>2</sub>), 0.86 (d, 6H, <sup>3</sup> $J_{H,H}$  = 6.6 Hz, 2 x CH<sub>3</sub>) ppm; <sup>13</sup>C-NMR (CDCl<sub>3</sub>, 100 MHz):  $\delta$  = 205.5 (CHO), 46.3 (CH), 39.0 (CH<sub>2</sub>), 33.5 (CH<sub>2</sub>), 29.7 (CH<sub>2</sub>), 29.5 (CH<sub>2</sub>), 27.9 (CH), 27.3 (CH<sub>2</sub>), 27.1 (CH<sub>2</sub>), 22.6 (2 x CH<sub>3</sub>), 16.8 (CH<sub>3</sub>) ppm; MS (70 eV, EI):  $m/z$  (%) = 184 (1) [M]<sup>+</sup>, 142 (5), 126 (8), 109 (6), 95 (12), 81 (14), 71 (25), 69 (18), 58 (100), 57 (39), 55 (32), 43 (65), 41 (68); IR (ATR):  $1/\lambda$  = 2952 (m), 2926 (s), 2855 (m), 2702 (w), 1729 (s), 1463 (m), 1382 (w), 1367 (w), 1132 (m), 955 (w), 920 (w), 723 (w) cm<sup>-1</sup>.

**2,6-Dimethyloctanal (123c):** Yield: 4.55 g (29.1 mmol, 81%); TLC (hexane/ethyl acetate = 10:1):  $R_f$  = 0.45; GC (BPX-5):  $I$  = 1142; <sup>1</sup>H-NMR (CDCl<sub>3</sub>, 400 MHz):  $\delta$  = 9.62 (d, 1H, <sup>3</sup> $J_{H,H}$  = 2.1 Hz, CH), 2.34 (sextd, 1H, <sup>3</sup> $J_{H,H}$  = 6.8 Hz, 2.0 Hz, CH), 1.75-1.63 (m, 1H, CH), 1.40-1.26 (m, 6H, 3 x CH<sub>2</sub>), 1.18-1.10 (m, 2H, CH<sub>2</sub>), 1.09 (d, 3H, <sup>3</sup> $J_{H,H}$  = 7.0 Hz, CH<sub>3</sub>), 0.85 (t, 3H, <sup>3</sup> $J_{H,H}$  = 8.1 Hz, CH<sub>3</sub>), 0.84 (d, 3H, <sup>3</sup> $J_{H,H}$  = 7.2 Hz, CH<sub>3</sub>) ppm; <sup>13</sup>C-NMR (CDCl<sub>3</sub>, 100 MHz):  $\delta$  = 205.4 (CHO), 46.4 (CH), 36.6 (CH<sub>2</sub>), 34.2 (CH), 30.9 (CH<sub>2</sub>), 29.4 (CH<sub>2</sub>), 24.4 (CH<sub>2</sub>), 19.1 (CH<sub>3</sub>), 13.4 (CH<sub>3</sub>), 11.3 (CH<sub>3</sub>) ppm; MS (70 eV, EI):  $m/z$  (%) = 156 (<1) [M]<sup>+</sup>, 114 (7), 109 (16), 98 (16), 81 (13), 71 (22), 69 (18), 58 (100), 57 (53), 55 (30), 43 (35), 41 (53); IR (ATR):  $1/\lambda$  = 2960 (m), 2931 (m), 2873 (m), 1705 (s), 1462 (m), 1417 (w), 1378 (w), 1291 (w), 1238 (w), 1184 (m), 942 (w), 734 (w) cm<sup>-1</sup>.

**2-Methyldecanal (123d):** Yield: 2.98 g (17.5 mmol, 76%); TLC (hexane/ethyl acetate = 20:1):  $R_f$  = 0.33; GC (BPX-5):  $I$  = 1273; <sup>1</sup>H-NMR (CDCl<sub>3</sub>, 400 MHz):  $\delta$  = 9.61 (d, 1H, <sup>3</sup> $J_{H,H}$  = 2.0 Hz, CH), 2.33 (sextd, 1H, <sup>3</sup> $J_{H,H}$  = 6.8 Hz, 2.0 Hz, CH), 1.73-1.64 (m, 2H, CH<sub>2</sub>), 1.36-1.25 (m, 12H, 6x CH<sub>2</sub>), 1.09 (d, 3H, <sup>3</sup> $J_{H,H}$  = 7.0 Hz, CH<sub>3</sub>), 0.88 (t, 3H, <sup>3</sup> $J_{H,H}$

= 6.9 Hz, CH<sub>3</sub>) ppm; <sup>13</sup>C-NMR (CDCl<sub>3</sub>, 100 MHz): δ = 205.4 (CHO), 46.3 (CH), 31.8 (CH<sub>2</sub>), 30.5 (CH<sub>2</sub>), 29.6 (CH<sub>2</sub>), 29.4 (CH<sub>2</sub>), 29.2 (CH<sub>2</sub>), 26.9 (CH<sub>2</sub>), 22.6 (CH<sub>2</sub>), 14.1 (CH<sub>3</sub>), 13.3 (CH<sub>3</sub>) ppm; MS (70 eV, EI): *m/z* (%) = 170 (<1) [M]<sup>+</sup>, 128 (5), 112 (8), 95 (5), 85 (5), 81 (6), 71 (17), 58 (100), 57 (26), 55 (17), 43 (30), 41 (30); IR (ATR): 1/λ = 2924 (s), 2855 (s), 1706 (s), 1464 (m), 1417 (w), 1378 (w), 1292 (w), 1237 (w), 1184 (m), 1111 (w), 939 (w), 722 (w), 637 (w), 543 (w) cm<sup>-1</sup>.

**General procedure for the preparation of α,β-unsaturated methyl esters via Horner-Wadsworth-Emmons reaction:** To a cooled (0°C) solution of diisopropylamine (0.1 M in THF, 1.05 eq.) *n*-butyllithium (1.6 M in Hexan, 1.05 eq.) was added slowly and the solution stirred for 30 min at 0°C. After being cooled to -78°C trimethylphosphonoacetate (1.05 eq.) was added and the solution was stirred for 1 h. The aldehyde (0.4 M in THF, 1 eq.) was added and the reaction mixture stirred for 3 h at -78°C. The mixture was allowed to warm to room temperature, the reaction was quenched with H<sub>2</sub>O and saturated NaCl solution, and the layers were separated. The aqueous layer was extracted with ethyl acetate, the combined organic layers were dried over MgSO<sub>4</sub>, filtered, and the solvents were evaporated. Column chromatography of the residue on silica gel afforded the α,β-unsaturated methyl ester as a colourless liquid.

**Methyl (*E*)- and (*Z*)-4,11-dimethyldodec-2-enoate (124a):** Yield: 0.38 g (1.56 mmol, 70%), diastereomeric ratio *E* : *Z* = 87 : 13.

Methyl (*Z*)-4,11-dimethyldodec-2-enoate: TLC (hexane/ethyl acetate = 30:1): *R*<sub>f</sub> = 0.22; GC (BPX-5): *I* = 1587; <sup>1</sup>H-NMR (CDCl<sub>3</sub>, 400 MHz): δ = 5.97 (dd, 1H, <sup>3</sup>*J*<sub>H,H</sub> = 11.5 Hz, 10.3 Hz, =CH), 5.71 (dd, 1H, <sup>3</sup>*J*<sub>H,H</sub> = 11.5 Hz, <sup>4</sup>*J*<sub>H,H</sub> = 0.9 Hz, =CH), 3.70 (s, 3H, CH<sub>3</sub>), 3.5-3.43 (m, 1H, CH), 1.51 (non, 1H, <sup>3</sup>*J*<sub>H,H</sub> = 6.6 Hz, CH), 1.36-1.23 (m, 10H, 5 x CH<sub>2</sub>), 1.16-1.11 (m, 2H, CH<sub>2</sub>), 1.00 (d, 3H, <sup>3</sup>*J*<sub>H,H</sub> = 6.7 Hz, CH<sub>3</sub>), 0.86 (d, 6H, <sup>3</sup>*J*<sub>H,H</sub> = 6.6 Hz, 2 x CH<sub>3</sub>) ppm; <sup>13</sup>C-NMR (CDCl<sub>3</sub>, 100 MHz): δ = 166.8 (C=O), 156.6 (=CH), 117.7 (=CH), 50.9 (CH<sub>3</sub>), 39.0 (CH<sub>2</sub>), 37.0(CH<sub>2</sub>), 32.7 (CH), 29.8 (CH<sub>2</sub>), 29.7 (CH<sub>2</sub>), 27.9 (CH), 27.4 (CH<sub>2</sub>), 27.2 (CH<sub>2</sub>), 22.6 (2 x CH<sub>3</sub>), 20.3 (CH<sub>3</sub>) ppm; MS (70 eV, EI): *m/z* (%) = 240 (36) [M]<sup>+</sup>, 209 (12), 128 (38), 127 (100), 114 (30), 96 (34), 95 (49), 81 (40), 69 (29), 67 (33), 55 (47), 43 (69), 41 (61); HRMS Calcd. for C<sub>15</sub>H<sub>28</sub>O<sub>2</sub>: 240.20893; found: 240.21014; IR (ATR): 1/λ = 2953 (m), 2925 (m), 2854 (m), 1726



(s), 1645 (m) 1462 (m), 1437 (m), 1368 (w), 1194 (s), 1174 (s), 1135 (m), 1007 (m), 932 (w), 822 (s), 724 (w)  $\text{cm}^{-1}$ ; UV/VIS ( $\text{CH}_2\text{Cl}_2$ ):  $\lambda_{\text{max}}$  ( $\log \epsilon$ ) = 230 (3.28) nm.

Methyl (*E*)-4,11-dimethyldodec-2-enoate: TLC (hexane/ethyl acetate = 30:1):  $R_f$  = 0.10; GC (BPX-5):  $I$  = 1679;  $^1\text{H-NMR}$  ( $\text{CDCl}_3$ , 400 MHz):  $\delta$  = 6.87 (dd, 1H,  $^3J_{\text{H,H}}$  = 15.7 Hz, 7.9 Hz, =CH), 5.78 (dd, 1H,  $^3J_{\text{H,H}}$  = 15.7 Hz,  $^4J_{\text{H,H}}$  = 1.2 Hz, =CH), 3.73 (s, 3H,  $\text{CH}_3$ ), 2.34-2.24 (m, 1H, CH), 1.51 (non, 1H,  $^3J_{\text{H,H}}$  = 6.6 Hz, CH), 1.36-1.25 (m, 10H, 5 x  $\text{CH}_2$ ), 1.18-1.11 (m, 2H,  $\text{CH}_2$ ), 1.04 (d, 3H,  $^3J_{\text{H,H}}$  = 6.7 Hz,  $\text{CH}_3$ ), 0.86 (d, 6H,  $^3J_{\text{H,H}}$  = 6.6 Hz, 2 x  $\text{CH}_3$ ) ppm;  $^{13}\text{C-NMR}$  ( $\text{CDCl}_3$ , 100 MHz):  $\delta$  = 167.4 (C=O), 155.1 (=CH), 119.1 (=CH), 51.4 ( $\text{CH}_3$ ), 40.0 ( $\text{CH}_2$ ), 36.6 (CH), 36.0 ( $\text{CH}_2$ ), 29.8 ( $\text{CH}_2$ ), 29.7 ( $\text{CH}_2$ ), 27.9 (CH), 27.3 ( $\text{CH}_2$ ), 27.1 ( $\text{CH}_2$ ), 22.6 (2 x  $\text{CH}_3$ ), 19.4 ( $\text{CH}_3$ ) ppm; MS (70 eV, EI):  $m/z$  (%) = 240 (5)  $[\text{M}]^+$ , 209 (21), 185 (6), 166 (14), 128 (100), 127 (48), 110 (38), 96 (69), 95 (48), 87 (36), 81 (53), 69 (50), 67 (35), 55 (69), 43 (93), 41 (81); HRMS Calcd. for  $\text{C}_{15}\text{H}_{28}\text{O}_2$ : 240.20893; found: 240.21040; IR (ATR):  $1/\lambda$  = 2953 (m), 2926 (s), 2855 (m), 1726 (s), 1656 (m) 1464 (m), 1436 (m), 1367 (w), 1311 (w), 1270 (m), 1195 (m), 1172 (s), 1035 (w), 1015 (w), 984 (m), 863 (w), 824 (w), 724 (m)  $\text{cm}^{-1}$ ; UV/VIS ( $\text{CH}_2\text{Cl}_2$ ):  $\lambda_{\text{max}}$  ( $\log \epsilon$ ) = 231 (3.16) nm.

**Methyl (*E*)- and (*Z*)-4,8-dimethyldec-2-enoate (124c):** Yield: 1.78 g (98.4 mmol, 65%); diastereomeric ratio *E* : *Z* = 67 : 33.

Methyl (*Z*)-4,8-dimethyldec-2-enoate: TLC (hexane/ethyl acetate = 30:1):  $R_f$  = 0.33; GC (BPX-5):  $I$  = 1389;  $^1\text{H-NMR}$  ( $\text{CDCl}_3$ , 400 MHz):  $\delta$  = 5.97 (ddd, 1H,  $^3J_{\text{H,H}}$  = 11.4 Hz, 10.3 Hz,  $^4J_{\text{H,H}}$  = 1.2 Hz, =CH), 5.71 (dd, 1H,  $^3J_{\text{H,H}}$  = 11.6 Hz,  $^4J_{\text{H,H}}$  = 0.6 Hz, =CH), 3.70 (s, 3H,  $\text{CH}_3$ ), 3.58-3.45 (m, 1H, CH), 1.36-1.21 (m, 7H, 3 x  $\text{CH}_2$ , CH), 1.00 (d, 3H,  $^3J_{\text{H,H}}$  = 6.7 Hz,  $\text{CH}_3$ ), 0.84 (t, 3H,  $^3J_{\text{H,H}}$  = 7.3 Hz,  $\text{CH}_3$ ) 0.84-0.82 (m, 3H,  $\text{CH}_3$ ) ppm;  $^{13}\text{C-NMR}$  ( $\text{CDCl}_3$ , 100 MHz):  $\delta$  = 166.7 (C=O), 156.5 (=CH), 117.8 (=CH), 50.8 ( $\text{CH}_3$ ), 37.3 ( $\text{CH}_2$ ), 36.3 ( $\text{CH}_2$ ), 34.3 (CH), 32.7 (CH), 29.4 ( $\text{CH}_2$ ), 24.7 ( $\text{CH}_2$ ), 20.2 ( $\text{CH}_3$ ), 19.1 ( $\text{CH}_3$ ), 11.3 ( $\text{CH}_3$ ) ppm; MS (70 eV, EI):  $m/z$  (%) = 212 (20),  $[\text{M}]^+$ , 197 (1), 181 (9), 151 (13), 128 (27), 127 (100), 114 (38), 113 (18), 96 (27), 95 (52), 81 (42), 67 (37), 57 (33), 55 (44), 41 (50); HRMS Calcd. for  $\text{C}_{13}\text{H}_{24}\text{O}_2$ : 212.17763; found: 212.17859; IR (ATR):  $1/\lambda$  = 2958 (m), 2927 (m), 2872 (m), 1726 (s), 1645 (m), 1460 (m), 1437 (m), 1407 (m), 1376 (w), 1196 (s), 1174 (s), 1007 (m), 934 (w), 822 (s), 729 (w)  $\text{cm}^{-1}$ ; UV/VIS ( $\text{CH}_2\text{Cl}_2$ ):  $\lambda_{\text{max}}$  ( $\log \epsilon$ ) = 229 (3.43) nm.

Methyl (*E*)-4,8-dimethyldec-2-enoate: TLC (hexane/ethyl acetate = 30:1):  $R_f$  = 0.17; GC (BPX-5):  $I$  = 1478;  $^1\text{H-NMR}$  ( $\text{CDCl}_3$ , 400 MHz):  $\delta$  = 6.87 (ddd, 1H,  $^3J_{\text{H,H}}$  = 15.7 Hz, 7.9 Hz,  $^4J_{\text{H,H}}$  = 1.8 Hz, =CH), 5.78 (dd, 1H,  $^3J_{\text{H,H}}$  = 15.7 Hz,  $^4J_{\text{H,H}}$  = 1.1 Hz, =CH), 3.73 (s, 3H,  $\text{CH}_3$ ), 2.30 (sept, 1H,  $^3J_{\text{H,H}}$  = 6.7 Hz, CH), 1.36-1.23 (m, 7H, 3 x  $\text{CH}_3$ , CH), 1.15-1.07 (m, 2H,  $\text{CH}_2$ ), 1.04 (d, 3H,  $^3J_{\text{H,H}}$  = 6.7 Hz,  $\text{CH}_3$ ), 0.85 (t, 3H,  $^3J_{\text{H,H}}$  = 7.2 Hz,  $\text{CH}_3$ ), 0.83 (d, 3H,  $^3J_{\text{H,H}}$  = 6.0 Hz,  $\text{CH}_3$ ) ppm;  $^{13}\text{C-NMR}$  ( $\text{CDCl}_3$ , 100 MHz):  $\delta$  = 167.4 (C=O), 155.1 (=CH), 119.1 (=CH), 51.4 ( $\text{CH}_3$ ), 36.7 (CH), 36.6 ( $\text{CH}_2$ ), 36.3 ( $\text{CH}_2$ ), 34.3 (CH), 29.5 ( $\text{CH}_2$ ), 24.7 ( $\text{CH}_2$ ), 19.4 ( $\text{CH}_3$ ), 19.2 ( $\text{CH}_3$ ), 11.4 ( $\text{CH}_3$ ) ppm; MS (70 eV, EI):  $m/z$  (%) = 212 (3),  $[\text{M}]^+$ , 197 (1), 181 (24), 151 (25), 138 (20), 128 (100), 127 (66), 123 (40), 114 (42), 110 (45), 96 (70), 95 (57), 87 (52), 83 (52), 82 (52), 81 (74), 70 (41) 69 (60), 57 (67), 55 (88), 41 (77); HRMS Calcd. for  $\text{C}_{13}\text{H}_{24}\text{O}_2$ : 212.17763; found: 212.17966; IR (ATR):  $1/\lambda$  = 2959 (m), 2928 (m), 2873 (m), 1725 (s), 1657 (m), 1460 (m), 1435 (m), 1378 (w), 1352 (w), 1269 (s), 1199 (m), 1173 (s), 1152 (m), 1016 (m), 984 (m), 865 (m), 724 (w)  $\text{cm}^{-1}$ ; UV/VIS ( $\text{CH}_2\text{Cl}_2$ ):  $\lambda_{\text{max}}$  (log  $\epsilon$ ) = 229 (3.38) nm.

**Methyl (*E*)- and (*Z*)-4-methyldodec-2-enoate (124d):** Yield: 2.26 g (9.97 mmol, 85%); diastereomeric ratio *E* : *Z* = 65 : 35.

Methyl (*Z*)-2-methyldodec-2-enoate: TLC (hexane/ethyl acetate = 30:1):  $R_f$  = 0.20; GC (BPX-5):  $I$  = 1528;  $^1\text{H-NMR}$  ( $\text{CDCl}_3$ , 400 MHz):  $\delta$  = 5.97 (dd, 1H,  $^3J_{\text{H,H}}$  = 11.5 Hz, 10.3 Hz, =CH), 5.71 (dd, 1H,  $^3J_{\text{H,H}}$  = 10.5 Hz,  $^4J_{\text{H,H}}$  = 0.9 Hz, =CH), 3.70 (s, 3H,  $\text{CH}_3$ ), 3.54-3.44 (m, 1H, CH), 1.36-1.25 (m, 14H, 7 x  $\text{CH}_2$ ), 1.00 (d, 3H,  $^3J_{\text{H,H}}$  = 6.7 Hz,  $\text{CH}_3$ ), 0.87 (d, 3H,  $^3J_{\text{H,H}}$  = 7.0 Hz,  $\text{CH}_3$ ) ppm;  $^{13}\text{C-NMR}$  ( $\text{CDCl}_3$ , 100 MHz):  $\delta$  = 166.8 (C=O), 156.6 (=CH), 117.7 (=CH), 50.9 ( $\text{CH}_3$ ), 37.0 ( $\text{CH}_2$ ), 32.7 (CH), 31.9 ( $\text{CH}_2$ ), 29.7 ( $\text{CH}_2$ ), 29.5 ( $\text{CH}_2$ ), 29.3 ( $\text{CH}_2$ ), 27.3 ( $\text{CH}_2$ ), 22.6 ( $\text{CH}_2$ ), 20.2 ( $\text{CH}_3$ ), 14.0 ( $\text{CH}_3$ ) ppm; MS (70 eV, EI):  $m/z$  (%) = 226 (31)  $[\text{M}]^+$ , 195 (15), 152 (10), 128 (31), 127 (100), 114 (30), 96 (29), 95 (43), 87 (15), 81 (31), 69 (18), 67 (28), 55 (33), 43 (26), 41 (37); HRMS Calcd. for  $\text{C}_{14}\text{H}_{26}\text{O}_2$ : 226.19328; found: 226.19283; IR (ATR):  $1/\lambda$  = 2955 (m), 2924 (s), 2854 (m), 1725 (s), 1645 (m), 1460 (m), 1437 (m), 1407 (m), 1194 (s), 1174 (s), 1007 (m), 931 (w), 822 (s), 723 (w)  $\text{cm}^{-1}$ ; UV/VIS ( $\text{CH}_2\text{Cl}_2$ ):  $\lambda_{\text{max}}$  (log  $\epsilon$ ) = 230 (3.36) nm.

Methyl (*E*)-2-methyldodec-2-enoate: TLC (hexane/ethyl acetate = 30:1):  $R_f$  = 0.10; GC (BPX-5):  $I$  = 1619;  $^1\text{H-NMR}$  ( $\text{CDCl}_3$ , 400 MHz):  $\delta$  = 6.87 (dd, 1H,  $^3J_{\text{H,H}}$  = 15.7 Hz, 7.9 Hz, =CH), 5.77 (dd, 1H,  $^3J_{\text{H,H}}$  = 15.7 Hz,  $^4J_{\text{H,H}}$  = 1.2 Hz, =CH), 3.73 (s, 3H,  $\text{CH}_3$ ),

2.34-2.24 (m, 1H, CH), 1.30-1.23 (m, 14H, 7 x CH<sub>2</sub>), 1.04 (d, 3H, <sup>3</sup>J<sub>H,H</sub> = 6.7 Hz, CH<sub>3</sub>), 0.88 (d, 3H, <sup>3</sup>J<sub>H,H</sub> = 6.9 Hz, CH<sub>3</sub>) ppm; <sup>13</sup>C-NMR (CDCl<sub>3</sub>, 100 MHz): δ = 167.4 (C=O), 155.1 (=CH), 119.1 (=CH), 51.4 (CH<sub>3</sub>), 36.5 (CH), 36.0 (CH<sub>2</sub>), 31.9 (CH<sub>2</sub>), 29.6 (CH<sub>2</sub>), 29.5 (CH<sub>2</sub>), 29.3 (CH<sub>2</sub>), 27.2 (CH<sub>2</sub>), 22.6 (CH<sub>2</sub>), 19.4 (CH<sub>3</sub>), 14.1 (CH<sub>3</sub>) ppm; MS (70 eV, EI): *m/z* (%) = 226 (3) [M]<sup>+</sup>, 195 (26), 152 (24), 128 (100), 127 (51), 114 (28), 110 (31), 96 (69), 95 (40), 87 (37), 81 (46), 69 (40), 68 (29), 55 (58), 43 (39), 41 (50); HRMS Calcd. for C<sub>14</sub>H<sub>26</sub>O<sub>2</sub>: 226.19328; found: 226.19424; IR (ATR): 1/λ = 2956 (m), 2925 (s), 2854 (m), 1726 (s), 1657 (m), 1460 (m), 1435 (m), 1351 (w), 1269 (s), 1194 (m), 1172 (s), 1149 (m), 1035 (m), 1017 (m), 983 (m), 863 (m), 723 (m) cm<sup>-1</sup>; UV/VIS (CH<sub>2</sub>Cl<sub>2</sub>): λ<sub>max</sub> (log ε) = 230 (3.29) nm.

**General procedure for hydrogenation of α,β-unsaturated methyl esters:** Upon addition of Pt/C (5% Pt on charcoal, 0.1 eq.) the α,β-unsaturated methyl ester (0.1 M in EtOH, 1 eq.) was hydrogenated for 1 h at 25°C and an H<sub>2</sub> pressure of 40 bar. After filtration over celite the solvent was evaporated. Column chromatography of the residue on silica gel afforded the saturated ester as a colourless liquid.

**Methyl 4-methyldodecanoate (90):** Yield: 0.28 g (1.24 mmol, 92%); TLC (hexane/ethyl acetate = 30:1): *R<sub>f</sub>* = 0.30; GC (HP-5 MS): *I* = 1572; <sup>1</sup>H-NMR (CDCl<sub>3</sub>, 400 MHz): δ = 3.66 (s, 3H, CH<sub>3</sub>), 2.38-2.24 (m, 2H, CH<sub>2</sub>), 1.71-1.61 (m, 1H, CH), 1.48-1.37 (m, 2H, CH<sub>2</sub>), 1.32-1.19 (m, 14H, 7 x CH<sub>2</sub>), 0.88 (t, 3H, <sup>3</sup>J<sub>H,H</sub> = 6.9 Hz, CH<sub>3</sub>), 0.87 (d, 3H, <sup>3</sup>J<sub>H,H</sub> = 6.3 Hz, CH<sub>3</sub>) ppm; <sup>13</sup>C-NMR (CDCl<sub>3</sub>, 100 MHz): δ = 174.6 (C=O), 51.4 (CH<sub>3</sub>), 36.6 (CH<sub>2</sub>), 32.4 (CH), 31.89 (2 x CH<sub>2</sub>), 31.87 (CH<sub>2</sub>), 29.9 (CH<sub>2</sub>), 29.6 (CH<sub>2</sub>), 29.3 (CH<sub>2</sub>), 26.9 (CH<sub>2</sub>), 22.7 (CH<sub>2</sub>), 19.2 (CH<sub>3</sub>), 14.1 (CH<sub>3</sub>) ppm; MS (70 eV, EI): *m/z* (%) = 228 (2) [M]<sup>+</sup>, 197 (11), 171 (35), 155 (21), 115 (81), 87 (100), 85 (17), 74 (56), 71 (17), 57 (29), 55 (39), 43 (32), 41 (32); IR (ATR): 1/λ = 2955 (m), 2924 (s), 2854 (m), 1742 (s), 1461 (m), 1436 (m), 1378 (w), 1254 (m), 1192 (m), 1168 (s), 1018 (w), 991 (w), 722 (w) cm<sup>-1</sup>.

**Methyl 4,11-dimethyldodecanoate (110):** Yield: 0.92 g (0.38 mmol, 91%); TLC (hexane/ethyl acetate = 20:1): *R<sub>f</sub>* = 0.18; GC (HP-5 MS): *I* = 1633; <sup>1</sup>H-NMR (CDCl<sub>3</sub>, 400 MHz): δ = 3.66 (s, 3H, CH<sub>3</sub>), 2.38-2.24 (m, 2H, CH<sub>2</sub>), 1.71-1.61 (m, 1H, CH), 1.51 (non, 1H, <sup>3</sup>J<sub>H,H</sub> = 6.6 Hz, CH), 1.46-1.37 (m, 2H, CH<sub>2</sub>), 1.29-1.25 (m, 10H, 5 x CH<sub>2</sub>),

1.17-1.12 (m, 2H, CH<sub>2</sub>), 0.87 (d, 3H, <sup>3</sup>J<sub>H,H</sub> = 6.4 Hz, CH<sub>3</sub>), 0.86 (d, 6H, <sup>3</sup>J<sub>H,H</sub> = 6.6 Hz, 2 x CH<sub>3</sub>) ppm; <sup>13</sup>C-NMR (CDCl<sub>3</sub>, 100 MHz): δ = 174.5 (C=O), 51.4 (CH<sub>3</sub>), 39.0 (CH<sub>2</sub>), 36.6 (CH<sub>2</sub>), 32.4 (CH), 31.89 (CH<sub>2</sub>), 31.88 (CH<sub>2</sub>), 29.9 (CH<sub>2</sub>), 29.9 (CH<sub>2</sub>), 27.9 (CH), 27.4 (CH<sub>2</sub>), 26.9 (CH<sub>2</sub>), 22.6 (2 x CH<sub>3</sub>), 19.3 (CH<sub>3</sub>) ppm; MS (70 eV, EI): *m/z* (%) = 242 (2) [M]<sup>+</sup>, 211 (6), 185 (32), 169 (14), 115 (11), 99 (8), 87 (100), 74 (50), 69 (17), 57 (23), 55 (30), 43 (32), 41 (24); IR (ATR): 1/λ = 2953 (m), 2925 (s), 2854 (m), 1742 (s), 1464 (m), 1436 (m), 1381 (w), 1253 (m), 1192 (m), 1168 (s), 1019 (w), 991 (w) cm<sup>-1</sup>.

**Methyl 4,8-dimethyldecanoate (112):** Yield: 0.28 g (1.30 mmol, 92%); TLC (hexane/ethyl acetate = 20:1): *R<sub>f</sub>* = 0.31; GC (HP-5 MS): *I* = 1442; <sup>1</sup>H-NMR (CDCl<sub>3</sub>, 400 MHz): δ = 3.67 (s, 3H, CH<sub>3</sub>), 2.38-2.24 (m, 2H, CH<sub>2</sub>), 1.71-1.62 (m, 1H, CH), 1.49-1.38 (m, 2H, CH<sub>2</sub>), 1.37-1.21 (m, 6H, 3 x CH<sub>2</sub>), 1.17-1.04 (m, 3H, CH<sub>2</sub>, CH), 0.87 (d, 3H, <sup>3</sup>J<sub>H,H</sub> = 6.3 Hz, CH<sub>3</sub>), 0.85 (t, 3H, <sup>3</sup>J<sub>H,H</sub> = 7.4 Hz, CH<sub>3</sub>) 0.84 (d, 3H, <sup>3</sup>J<sub>H,H</sub> = 6.1 Hz, CH<sub>3</sub>) ppm; <sup>13</sup>C-NMR (CDCl<sub>3</sub>, 100 MHz): δ = 174.5 (C=O), 51.4 (CH<sub>3</sub>), 37.0 (CH<sub>2</sub>), 36.8 (CH<sub>2</sub>), 34.3 (CH), 32.4 (CH), 31.9 (CH<sub>2</sub>), 31.8 (CH<sub>2</sub>), 29.5 (CH<sub>2</sub>), 24.3 (CH<sub>2</sub>), 19.2 (CH<sub>3</sub>), 19.1 (CH<sub>3</sub>), 11.3 (CH<sub>3</sub>) ppm; MS (70 eV, EI): *m/z* (%) = 214 (1) [M]<sup>+</sup>, 185 (5), 157 (32), 141 (18), 115 (11), 97 (8), 87 (100), 74 (44), 69 (24), 57 (31), 55 (41), 43 (21), 41 (32); IR (ATR): 1/λ = 2957 (m), 2926 (m), 2872 (m), 1741 (s), 1460 (m), 1436 (m), 1378 (m), 1255 (m), 1194 (m), 1169 (s), 1116 (m), 1016 (w), 992 (w), 773 (w) cm<sup>-1</sup>.

**Preparation of 5-methyloctanal (129):** To a cooled solution (-60°C) of oxalyl chloride (0.91 mL, 10.6 mmol) in dichloromethane (70 mL), DMSO (1.51 mL, 21.3 mmol) in dichloromethane (15 mL) was added and the solution was stirred for 10 min. The alcohol **128** (1.28 g, 8.86 mmol) in dichloromethane (15 mL) was added, and the solution stirred for 30 min. Upon the addition of NEt<sub>3</sub> (6.30 mL, 44.3 mmol) and stirring for another 10 min the solution was allowed to warm to room temperature, and H<sub>2</sub>O (50 mL) was added. After separation of the layers the aqueous layer was extracted with Et<sub>2</sub>O (3 x 100 mL) and the combined organic layers were dried with MgSO<sub>4</sub>, filtered, and the solvents were evaporated. The pure compound **129** (1.09 g, 7.63 mmol, 86%) was afforded as a colourless liquid after column chromatography on silica gel.

TLC (hexane/ethyl acetate = 10:1):  $R_f$  = 0.41; GC (BPX-5):  $I$  = 1077;  $^1\text{H-NMR}$  ( $\text{CDCl}_3$ , 400 MHz):  $\delta$  = 9.76 (t, 1H,  $^3J_{\text{H,H}}$  = 1.9 Hz, CH), 2.43-2.31 (m, 2H,  $\text{CH}_2$ ), 1.73-1.54 (m, 2H,  $\text{CH}_2$ ), 1.48-1.38 (m, 1H, CH), 1.37-1.22 (m, 4H, 2 x  $\text{CH}_2$ ), 1.20-1.05 (m, 2H,  $\text{CH}_2$ ), 0.88 (t, 3H,  $^3J_{\text{H,H}}$  = 7.5 Hz,  $\text{CH}_3$ ), 0.87 (d, 3H,  $^3J_{\text{H,H}}$  = 6.6 Hz,  $\text{CH}_3$ ) ppm;  $^{13}\text{C-NMR}$  ( $\text{CDCl}_3$ , 100 MHz):  $\delta$  = 202.9 (CHO), 44.1 ( $\text{CH}_2$ ), 39.1 ( $\text{CH}_2$ ), 36.4 ( $\text{CH}_2$ ), 32.2 (CH), 20.0 ( $\text{CH}_2$ ), 19.6 ( $\text{CH}_2$ ), 19.4 ( $\text{CH}_3$ ), 14.3 ( $\text{CH}_3$ ) ppm; MS (70 eV, EI):  $m/z$  (%) = 142 (<1) [ $\text{M}$ ] $^+$ , 124 (15), 109 (21), 96 (20), 95 (80), 81 (60), 70 (65), 69 (63), 57 (50), 55 (100), 43 (97), 41 (80); IR (ATR):  $1/\lambda$  = 2956 (s), 2927 (m), 2871 (m), 1709 (s), 1461 (m), 1412 (w), 1378 (w), 1283 (w), 1155 (w), 1117 (m), 1066 (w), 940 (m), 741 (w)  $\text{cm}^{-1}$ .

**Preparation of 6-methylnonan-2-ol (130):** The aldehyde **129** (1.21 g, 8.49 mmol) was added to a cooled ( $0^\circ\text{C}$ ) solution of methylmagnesium bromide (3.39 mL, 10.2 mmol) in  $\text{Et}_2\text{O}$  (20 mL). The solution was allowed to warm to room temperature and after the solution was stirred for 12 h, HCl (2 N, 40 mL) was added. Upon separation of the layers the aqueous layer was extracted with ethyl acetate (3 x 40 mL) and the solvents were evaporated. Column chromatography on silica gel afforded the alcohol **130** (0.99 g, 6.24 mmol, 74%) as a colourless liquid.

TLC (hexane/ethyl acetate = 5:1):  $R_f$  = 0.25; GC (BPX-5):  $I$  = 1172;  $^1\text{H-NMR}$  ( $\text{CDCl}_3$ , 400 MHz):  $\delta$  = 3.79 (sext, 1H,  $^3J_{\text{H,H}}$  = 6.2 Hz, CH), 1.83 (s br, 1H, OH), 1.45-1.23 (m, 9H, CH, 4 x  $\text{CH}_2$ ), 1.19 (d, 3H,  $^3J_{\text{H,H}}$  = 6.2 Hz,  $\text{CH}_3$ ), 1.15-1.05 (m, 2H,  $\text{CH}_2$ ), 0.88 (t, 3H,  $^3J_{\text{H,H}}$  = 7.0 Hz,  $\text{CH}_3$ ), 0.85 (d, 3H,  $^3J_{\text{H,H}}$  = 6.5 Hz,  $\text{CH}_3$ ) ppm;  $^{13}\text{C-NMR}$  ( $\text{CDCl}_3$ , 100 MHz):  $\delta$  = 68.1 (CH), 39.7 ( $\text{CH}_2$ ), 39.3 ( $\text{CH}_2$ ), 37.0 ( $\text{CH}_2$ ), 32.4 (CH), 23.4 ( $\text{CH}_2$ ), 23.2 ( $\text{CH}_2$ ), 20.1 ( $\text{CH}_2$ ), 19.5 ( $\text{CH}_3$ ), 14.3 ( $\text{CH}_3$ ) ppm; MS (70 eV, EI):  $m/z$  (%) = 158 (<1) [ $\text{M}$ ] $^+$ , 143 (5), 140 (1), 112 (6), 98 (16), 97 (46), 84 (34), 70 (42), 69 (45), 55 (57), 45 (100), 43 (51), 41 (37); IR (ATR):  $1/\lambda$  = 3341 (w br), 2958 (s), 2928 (s), 2869 (m), 1461 (m), 1376 (m), 1143 (w), 1116 (m), 1079 (w), 1012 (w), 936 (w), 912 (w), 740 (w)  $\text{cm}^{-1}$ .

## References

1. Dickschat, J. S.; Brock, N. L.; Citron, C. A.; Tudzynski, B. *ChemBioChem* **2011**, *12*, 2088–2095. doi:10.1002/cbic.201100268
2. Horiguchi, Y.; Matsuzawa, S.; Nakamura, E.; Kuwajima, I. *Tetrahedron Lett.* **1986**, *27*, 4025–4028. doi:10.1016/S0040-4039(00)84901-1
